# Supplementary material for: Braf mutation induces rapid neoplastic transformation in the aged and aberrantly methylated intestinal epithelium
Source: HighWire-hosted journal article supplement (doi:10.1136/gutjnl-2020-322166), 2021-07-06
Supplement: gutjnl-2020-322166supp011_data_supplement.xlsx [file gutjnl-2020-322166supp011_data_supplement.xlsx]

## Sheet: Supplementary Table S2
Supplementary Table S1: Differential gene expression analysis of 10 day old Braf mutant animals versus 14 month old Braf mutant animals in Type-B Loci.
Gene	FDR P-Value	Log2 Fold Change
Cstf2t	2.4425e-137	-3.93113
Fbn2	8.18251e-66	-3.66832
Col15a1	3.27256e-50	-2.22842
Adamts2	2.44482e-39	-3.80476
Fat4	6.75229e-33	-2.04255
Igf2bp3	6.40403e-27	-7.316
Gpc3	9.51606e-25	-5.0704
Hspg2	7.67455e-24	-1.66188
Col4a1	1.16195e-23	-2.58963
Arhgap28	6.36761e-22	-1.99025
Col4a2	8.29228e-22	-2.4296
Plxnd1	2.8589e-21	-1.23307
Emid1	3.95405e-20	-2.0048
Xkr6	8.16282e-20	-3.70802
Col5a1	1.22653e-19	-2.94126
Cd34	6.62613e-19	-2.28209
Dchs1	3.00649e-18	-1.7942
Nes	3.85097e-17	-2.64575
Serpinh1	3.17599e-16	-1.72773
Lamc1	3.40119e-16	-1.72654
Col5a3	1.33571e-15	-2.84067
Myh10	3.89167e-15	-1.80893
Akap12	6.37739e-15	-1.84317
Tgfb1i1	2.65116e-14	-1.865
Igfbp7	8.63421e-14	-1.30497
Adam19	1.01951e-13	-1.16935
Frem2	4.52126e-12	-2.68078
Clec14a	6.90635e-11	-1.94405
Mrc2	7.16372e-11	-1.69151
Obsl1	7.88916e-11	-2.46708
Irf4	8.78645e-11	3.73072
Thbd	4.50196e-10	-1.17076
Col16a1	6.48001e-10	-2.00521
Cdh11	6.70154e-10	-1.50625
Serpina1b	1.04014e-09	-2.1249
Pcdh7	1.51159e-09	-1.48834
Pcdh18	2.18445e-09	-1.86799
Col6a5	2.1901e-09	-1.88599
Rhoj	4.22838e-09	-1.54456
Dbn1	6.37047e-09	-1.51079
Tbc1d16	1.57407e-08	-1.29735
Fn1	2.52619e-08	-1.64766
Tbx2	3.03481e-08	-1.32619
Kirrel	4.72788e-08	-1.68846
Ncam1	6.15207e-08	-2.2779
Plekhh2	8.0584e-08	-2.06849
Pth1r	8.0584e-08	-2.55776
Trim47	8.0584e-08	-1.41525
P3h1	8.47117e-08	-1.94445
Gpx8	8.4766e-08	-2.09016
Htra1	9.99629e-08	-1.68612
Soga1	1.16704e-07	-0.993565
Tril	1.56126e-07	-1.81806
Srgap1	1.98956e-07	-1.94613
Gli1	2.09644e-07	-2.31638
C1qtnf2	2.14201e-07	-2.42694
C1qtnf6	2.54631e-07	-3.34341
9430020K01Rik	2.76345e-07	-1.61596
Map1b	2.95034e-07	-1.1489
Vash1	3.14973e-07	-2.59106
B3galt5	3.17775e-07	-4.82529
Asxl3	6.13064e-07	-4.65483
Osmr	6.97847e-07	-1.04727
Bmp8b	1.27139e-06	-2.33415
Tcf21	1.27921e-06	-1.4136
Lin28b	1.35155e-06	4.49687
8430408G22Rik	1.45947e-06	-2.46392
Kcp	1.70454e-06	-2.25608
Gpr153	1.8969e-06	-2.18412
Npr2	2.61551e-06	-1.49404
Mcam	2.74918e-06	-1.77987
Amotl1	2.79364e-06	-2.13487
Dkk3	2.8061e-06	-0.827758
Egflam	3.18852e-06	-1.36408
Myocd	3.51521e-06	-1.88392
Col12a1	3.75753e-06	-1.49279
Csf2ra	4.0081e-06	-0.97952
Gulp1	4.41495e-06	-1.44339
Crip2	5.58014e-06	-1.17707
Zeb2	7.20352e-06	-1.38939
Slc36a1	7.89546e-06	1.17523
Pcdh9	9.4155e-06	-4.09993
Crispld2	9.49039e-06	-1.75148
F2r	9.8472e-06	-0.904602
Scarf2	1.00809e-05	-1.41721
Camk1d	1.12064e-05	1.16978
Arhgef25	1.23924e-05	-1.26009
Col18a1	1.31049e-05	-1.71252
Timp3	1.36115e-05	-0.765345
Cadps	1.37449e-05	-2.09936
Cd248	1.47929e-05	-2.48774
Speg	1.47929e-05	-1.6972
Axl	1.53923e-05	-0.759354
Gjc1	1.62812e-05	-1.94435
Plxna4	1.70205e-05	-1.35925
Fam64a	1.95318e-05	-3.07271
Mest	2.05911e-05	-2.99043
Fgfr1	2.11255e-05	-1.30577
Adamts5	2.39376e-05	-2.02357
Dmrta2	2.69799e-05	2.34443
Raver2	2.69799e-05	-2.19446
Rgs17	2.70222e-05	-3.53855
Fendrr	3.10739e-05	-1.72028
Ptpn13	3.53891e-05	-2.0912
Sorbs3	3.72522e-05	-1.40177
Arsi	3.95013e-05	-2.82038
Mark1	3.98447e-05	-1.44005
Cav1	4.17923e-05	-2.29327
Scara3	4.51497e-05	-2.6071
Zfp618	4.51497e-05	-2.84718
Tanc2	4.53948e-05	-2.0148
Adamts14	4.55285e-05	-1.90736
Irs1	4.72522e-05	-1.52421
Gria4	4.863e-05	-1.99175
Sox11	5.43022e-05	-4.27933
Arhgap29	6.11804e-05	-1.17185
2200002J24Rik	6.21544e-05	2.64244
Adcy3	6.8472e-05	-1.11399
Gli2	7.22846e-05	-1.822
Cd93	7.22846e-05	-1.34758
Bdkrb2	7.58352e-05	-1.27494
Efs	7.72678e-05	-2.05052
Cul7	7.72678e-05	-0.945649
Plod2	7.79334e-05	-1.96435
Vim	7.79334e-05	-1.21522
Adamts1	7.79334e-05	-1.41718
B3gat2	9.11195e-05	5.35775
Pex5l	9.55565e-05	-1.88298
Syngr1	0.000101031	1.70359
Etv1	0.000101031	-1.52844
Zc3h12c	0.000101031	-1.41382
Rcn1	0.000101031	-0.881119
Prkg2	0.000101352	1.00602
Spag6l	0.000103121	3.61973
Piezo2	0.00012658	-2.08147
Kbtbd11	0.000136848	-1.07576
Gm13889	0.000136848	-1.31718
Shroom4	0.000136848	-2.61004
Cacna1e	0.000161423	2.3354
Pclo	0.000168545	-1.41
Pde10a	0.000172746	-2.62255
Tmcc2	0.000172746	-1.67428
Ppm1l	0.000174297	1.30446
Cux1	0.000185005	-0.440672
Foxf2	0.000185005	-1.26729
Bmper	0.000209671	-2.80151
Cadm1	0.000250312	-1.40868
Kremen2	0.000253363	-2.56104
Sall1	0.000307056	-1.82673
Ccdc3	0.000312578	-1.58093
Tshz3	0.000323952	-1.22583
Abcg1	0.000323952	-1.09029
Cd81	0.000324812	1.11387
Vldlr	0.000324812	-2.09146
Rora	0.000353233	-0.960984
Scube1	0.0003717	-1.27224
St8sia6	0.000376169	-1.24374
Shank3	0.000390474	-1.45947
Prickle1	0.00040186	-1.4611
Adamts19	0.000407544	-3.29214
Tmem184c	0.000411241	-1.41814
Zfp354c	0.000413848	-1.85928
Lifr	0.000424713	-0.962592
Dzip1	0.000424713	-1.32699
Lrrn1	0.000428148	-5.49924
2700081O15Rik	0.000444862	-1.22276
Wwc2	0.000445088	-1.61921
BC026585	0.00045402	-0.890447
Endod1	0.000465621	-2.47897
Rasip1	0.000474271	-1.15303
Kctd17	0.000475108	-3.57372
Sfrp1	0.000507353	-1.23726
Gm2115	0.000576864	-3.00186
Lamc3	0.000603165	-2.1305
Bhlhe41	0.00063255	3.22236
Egfl7	0.000699767	-1.47819
2020-09-08	0.000710174	-1.45906
Mprip	0.000745147	-0.644052
She	0.00079523	-1.23994
Fbxl7	0.000818717	-2.79947
Adgrl4	0.000821583	-1.36552
Cacna1i	0.000829732	4.94475
Plekhg3	0.000838856	-1.12859
Thsd4	0.000875817	-2.15064
Ergic3	0.000928886	0.409811
Colec12	0.000935577	-1.23277
Kank4	0.000969124	-2.48063
Lap3	0.000980251	2.02449
Apcdd1	0.00107514	-1.5399
Wnt5a	0.00115852	-1.62232
Mtss1l	0.00115852	-1.30231
Mdga1	0.00125833	-4.02033
Kcnq4	0.00125833	-1.91716
Nov	0.00129611	-4.34573
AI429214	0.00133372	-2.62515
Cpxm2	0.00140069	-1.25546
Cdk14	0.001465	-1.44104
Irs2	0.00151765	-0.92369
Sobp	0.00157289	-2.07851
Foxf1	0.00166554	-1.02272
Arhgef40	0.00166685	-1.86702
Adarb1	0.0016841	-1.20896
Arhgap20	0.00171126	-2.39166
Hivep3	0.00171524	-1.43825
Ano5	0.00177456	-2.9065
Dapk1	0.00185637	-2.20895
Shc2	0.00191457	-1.93353
Zfp37	0.00194856	-2.03717
Fes	0.00196434	-0.581676
Prr16	0.00213561	-2.54473
Hpca	0.00213561	2.69798
Syt14	0.00213929	-1.63325
Dlk1	0.00225258	-6.15912
Scube3	0.00225272	-1.77298
Creg1	0.00225272	0.828966
Megf8	0.00225272	-0.715683
Fam43a	0.00228914	-1.37987
Dnmt3a	0.00228914	-0.427537
Ndrg4	0.00232173	-1.85543
Lrp3	0.00235819	-1.12197
2020-09-04	0.00235819	-1.23116
2020-09-04	0.00235819	-1.23116
Hspa12b	0.00236685	-1.52924
Ank1	0.00239389	-1.53883
Adam12	0.00239389	-1.91715
Lbh	0.00270027	-2.22838
Hecw2	0.00294503	-1.27812
Ttll11	0.0029752	1.1026
Rbpms	0.0029752	-1.72354
Gpx3	0.00303523	-0.613899
Txnip	0.00303523	-1.44905
Jam3	0.00303523	-1.16885
Daam2	0.00309808	-1.30249
Cttnbp2nl	0.0032207	-1.54108
Snai1	0.00327942	-1.90964
Kcns3	0.00330351	-1.71648
Rab38	0.00335967	-2.36923
Oaz1	0.00338145	0.530067
Pam	0.00344846	-1.37328
Fscn1	0.00352559	-1.0967
Id4	0.00359538	-2.00209
Pias3	0.00367095	-0.581618
Hoga1	0.00393899	1.7951
Pigyl	0.00399178	0.668526
1700030C10Rik	0.00399178	-2.14541
Cdh6	0.00399178	-4.44664
Baiap2	0.00405847	-1.70535
Kif26a	0.00410272	-1.3933
Phldb2	0.00419143	-2.15147
Gramd4	0.00440421	0.393874
Steap1	0.00440421	1.49215
Igfbp3	0.00448663	-0.969217
Rem1	0.00448663	-1.28851
Chst2	0.00452048	-0.899625
Fut10	0.00470454	-1.28205
Cdr2l	0.00470454	-1.70225
Sncaip	0.00494811	-1.43139
Chst1	0.00500644	-1.68454
1110008F13Rik	0.00507401	0.52826
H2afy2	0.00508576	-1.4826
Hpn	0.00526811	-1.96109
Osbpl2	0.00541875	-0.48899
Galnt16	0.00541875	-1.86456
C530005A16Rik	0.00541875	1.44943
Nlrp5-ps	0.00557661	-3.25228
Sox12	0.00569154	-1.60047
Lhx6	0.00580067	-2.12896
Spock3	0.00606929	-3.05056
2610307P16Rik	0.0060733	-3.34461
Erc2	0.00614425	1.31781
Nrn1	0.00629047	-4.15642
Loxl3	0.00636574	-0.853033
Bmp7	0.00689316	-0.783774
Rab12	0.00689782	-0.825959
Srgap2	0.00705397	-0.799358
Plcb1	0.00705397	-0.858274
Adam15	0.00712148	-0.574876
Cygb	0.00714493	-0.967716
Zfp568	0.00719502	-0.46259
Itgb3	0.00722495	-1.08589
Ppp1r3d	0.00722495	-1.6682
Pdgfb	0.00729662	-1.20998
Smg7	0.0073235	-0.342144
Tspan18	0.00751963	-1.46389
Camk2n1	0.00756262	-1.29137
Cyp24a1	0.00763251	-5.20264
Ptch1	0.00770834	-0.740479
Klhl29	0.00772479	-1.7831
Kcnmb4os2	0.00776622	5.33418
Bmp6	0.00807203	-0.899882
Cacna2d1	0.00821303	-1.85226
Flrt2	0.00836657	-3.19708
Gria3	0.00861693	-1.8601
Ppfibp1	0.00886537	-0.5703
Pygo1	0.00896178	-2.11618
Mdk	0.00903427	-1.06337
Nr1h3	0.00950439	1.26915
Pdp2	0.00969632	0.825386
Prkg1	0.00975796	-1.40414
Tie1	0.00978015	-1.20563
Zfp467	0.00984198	-1.96542
Wnt10a	0.010407	4.47277
Tirap	0.010407	-0.578729
Cib2	0.0105149	1.9272
Trim3	0.0105217	-0.534954
Pdlim1	0.0105438	-0.661184
Frzb	0.0105438	-1.26963
Fzd3	0.0105438	-2.72723
Dennd5a	0.0105808	-0.737453
Aldh6a1	0.0105808	0.386289
Sycp3	0.0111873	2.51818
Tmem132e	0.0115733	-1.03426
Ndst3	0.0118341	-3.19202
Pitpnm3	0.0119233	-2.77804
Apobec2	0.0126585	2.3244
Il12rb2	0.0127549	1.89416
Ttc7b	0.0130944	-0.925353
Cops3	0.0132135	0.287064
Ushbp1	0.0135718	-1.53647
Ece1	0.0135969	-0.382836
Hhip	0.013611	-1.17747
Tdrp	0.0137891	-1.38844
Cmtm3	0.0138267	-0.858505
Cacna1b	0.0138487	-1.68805
Tmco1	0.0142782	0.646599
Fam219a	0.0144239	-1.00935
Aip	0.0149921	0.461373
Acp5	0.0150672	0.482265
Tacc2	0.0154259	-0.640335
Tbc1d10c	0.0154674	1.83715
Wasf1	0.0155013	-4.01848
Ptpn14	0.0159617	-1.22944
Mtmr7	0.0161574	0.801801
Slc36a4	0.0162282	-1.86748
Epha7	0.0163016	-2.39207
Megf6	0.016342	-1.61042
B3galnt1	0.0164085	-1.61198
Vgll3	0.016809	-2.49758
Sacm1l	0.0169043	0.614085
Adamts3	0.0175973	-1.13244
Mgat2	0.0176121	0.568955
Lin7a	0.0176587	-3.12138
Slc1a1	0.0176587	1.85074
Psd3	0.0176587	-1.10494
Nbeal1	0.0178066	-0.356639
Jdp2	0.0179342	-0.867583
Pnkd	0.0179342	0.609461
6430548M08Rik	0.0181201	-1.25475
Adamtsl4	0.0184247	-0.684404
Kcnh1	0.0189874	-1.47694
Cdkn2a	0.0189874	2.32159
Peg10	0.0193458	-2.82898
Nsun4	0.0193969	0.733362
Hdgfrp3	0.0194081	-0.769693
Gpld1	0.020276	0.718108
Nox4	0.0204683	-2.10686
Nkx2-3	0.0204683	-0.968212
Pabpc4l	0.0208737	-2.78986
Mllt3	0.0210228	-0.481522
Mmp23	0.0210533	-1.31553
Utp14b	0.0221569	-0.708699
1700025G04Rik	0.0221569	1.17422
Fkbp5	0.0224855	-2.01824
Vstm2l	0.0224855	0.849721
Npr3	0.0224855	-2.07285
Kcnt2	0.0234209	-2.21233
Tcf7l1	0.0234587	-2.31534
Grin1os	0.0238563	-1.20625
L3hypdh	0.0238729	-1.42177
Mapk8ip2	0.024441	-1.82494
Gpr68	0.024652	1.23394
Zfp423	0.0246543	-1.19282
Htr1b	0.025999	-1.56935
Dtx3	0.025999	-0.904282
Setbp1	0.025999	-1.93903
Cnn2	0.0261576	-0.78935
Hmcn1	0.0262542	-1.59889
Dusp10	0.0266589	-1.29397
Enox1	0.0272808	-1.7083
Zfp503	0.0273433	-1.37106
2020-03-03	0.0279643	-1.94897
Rarres1	0.0280106	-1.65733
Ssbp2	0.0281592	-0.767522
Cyfip2	0.0281705	1.61064
Dus4l	0.0281705	0.683081
Tmem98	0.0282284	0.646865
Faah	0.0285728	1.48895
Gm2061	0.0285728	-1.92886
Trps1	0.0287724	-0.718062
Adgrl3	0.0291505	-1.16738
Ikzf1	0.0295132	1.54789
Efemp2	0.0295475	-0.976434
Tns1	0.0295475	-0.920957
Fadd	0.029644	0.422473
Slc12a5	0.0297001	-1.72742
Ndufs2	0.0297001	0.387742
Kcnip3	0.0297374	-1.2268
Trim44	0.0299016	0.453377
Gas2l3	0.0301848	0.830959
Ascl2	0.0301993	1.96783
Sod2	0.0303048	0.322073
Fzd5	0.0303191	0.495119
1700112E06Rik	0.0316419	-1.45286
Hey2	0.0318031	-1.51418
Kif3c	0.0318031	-0.722805
Anks6	0.0322699	-1.16136
Grem1	0.0322794	2.50891
Arhgap33	0.0322794	-1.4143
Ntn1	0.0322794	-0.796061
Relb	0.0324559	0.743397
Rps27l	0.0324559	0.262408
Map9	0.0325788	-2.06772
Tox3	0.0326642	-0.86269
Wnt6	0.0327257	1.74664
Wrn	0.0327925	0.357121
Cnga3	0.0327925	-2.72239
Mras	0.0331584	-0.801206
Lims2	0.0333575	-0.880043
Neurl1a	0.0333575	-1.28983
Asap1	0.0333575	-1.2747
Tcf7	0.033454	1.06412
Bdnf	0.0334814	-2.7077
Rtkn2	0.0334814	-2.34059
Dst	0.0334814	-0.608164
Chsy3	0.0334814	-2.4274
Lrrc24	0.0334814	0.690397
Ddt	0.0335783	0.532919
Slco5a1	0.0335783	2.49611
Scrn1	0.0336018	-1.29419
Cdh3	0.0351755	-1.83518
Amn	0.0351755	1.65932
Sgpl1	0.0364496	1.07434
Xpot	0.0370011	0.260467
2020-09-05	0.0370765	0.422239
Msrb2	0.0371039	-2.2168
Mfsd6	0.0379091	-1.00468
Dgkh	0.0379091	-1.74932
Trabd2b	0.0379091	-1.84836
Kif3b	0.0379091	-0.257145
Ltbp1	0.0379091	-1.05912
Panx1	0.0379371	0.626753
Ascl4	0.0380621	4.05651
Sox6	0.0386747	0.704247
Paip1	0.0390203	0.301791
Mn1	0.03939	-1.08087
Chst3	0.0395024	3.01807
Efcc1	0.0397228	-1.16367
Vkorc1	0.0399935	0.799684
Ptprm	0.040009	-1.00744
Mmp16	0.040819	-1.85301
Tmem108	0.0408199	-2.68595
Aimp1	0.0411868	0.523559
Rgs4	0.0414406	-0.902391
Tmeff1	0.041521	-1.67242
A930011G23Rik	0.041521	-1.88466
Pkig	0.0419146	0.490174
Syna	0.04281	2.20814
Oxtr	0.0428131	-3.59353
Bcl7c	0.0437584	0.50811
Scarb2	0.0437948	-0.696947
Nav1	0.0438368	-1.0172
Sema5b	0.0446588	-2.67669
Nptx2	0.044957	-1.33738
Ano7	0.0463263	-0.716637
Ikzf3	0.046857	1.70481
Tinagl1	0.046857	-1.02835
Usp13	0.0476013	-2.78681
Msx1	0.0481236	3.45234
Gpr27	0.0482125	-3.15991
5730559C18Rik	0.048289	-0.996666
Sdk2	0.0499142	-1.4716
Mfsd6l	0.0499142	0.528981
Scn1b	0.0500565	-0.874324
Enah	0.0508236	-1.17661
Galnt12	0.0515101	-1.36962
Ace	0.0535605	2.38535
Plxnc1	0.0537599	0.916462
Tmem132a	0.0552677	-0.942024
Grip1	0.0555097	-3.41523
Cdc42ep3	0.0557144	-1.30335
Plvap	0.0559534	-1.03446
Ncoa7	0.0563755	-1.11778
Vps13d	0.0575519	-0.260975
Unc80	0.0575519	-2.42421
Pdgfd	0.0575519	-1.00733
Slc22a4	0.0577513	1.29076
P3h2	0.0577513	-0.853668
Nek5	0.058916	1.84947
Il27ra	0.0592083	1.35053
Arhgef28	0.0597023	-0.921709
Zhx2	0.0598169	0.470387
Tbc1d19	0.0605587	-0.809581
Bace1	0.0605864	-1.13066
Uqcrq	0.0606366	0.521625
Ephb3	0.0606855	-0.89122
Lypd1	0.0616106	1.28181
Ppa1	0.0616106	0.892673
Zfp30	0.0616161	-1.26114
Tet2	0.0616161	-0.452275
Bambi	0.0616161	-0.753865
Fzd8	0.0616161	-2.08906
Kdr	0.0616161	-1.02312
1190002N15Rik	0.0622289	1.11388
Rin3	0.0625174	-0.676322
Otud1	0.0636262	-1.38927
Ganab	0.0636262	0.321315
Kcnj5	0.0638949	-2.154
D10Jhu81e	0.0643253	0.418517
Fgfr3	0.0647803	0.69948
Parvb	0.0654918	-0.861958
Chn1	0.0660913	-1.21207
Actn2	0.0667362	2.40815
Zc2hc1a	0.0667968	-0.967986
Prkar1b	0.0668293	-1.0632
Pla2g10os	0.0672818	-1.84088
Cand2	0.0672818	1.05423
Igtp	0.0675488	1.26148
Pdlim3	0.0675488	-1.16514
Tfap2a	0.0675488	3.72532
Hyou1	0.0675488	0.568397
R3hdm1	0.0686618	-0.435709
Pfdn2	0.0686618	0.441726
Napb	0.0686618	-0.961216
Eid2	0.0686618	-1.9853
Rnf39	0.0691122	-1.69906
Zeb1	0.0696277	-0.597054
Map3k5	0.0700034	-0.645217
Lrrc8c	0.0700034	-0.519535
Slc25a39	0.0701868	0.397722
Trp53inp2	0.0716002	-1.39654
Krit1	0.0716002	-0.309624
Map4k3	0.0722138	-0.350487
2020-03-05	0.0722138	0.65764
Cfap45	0.0722882	-2.00594
Dnajb4	0.0729838	0.798706
Ccdc149	0.0741444	-1.06787
Igf2bp2	0.0746022	-0.806673
Sytl2	0.0749891	-1.26609
Aldh16a1	0.0760742	0.575015
Spsb4	0.0762814	1.28983
Rnf17	0.0762814	-3.0091
Kbtbd12	0.0764871	2.37372
Mrpl39	0.0765318	0.279895
Rilpl1	0.0766151	-1.04174
Tspan11	0.0779917	-3.53662
Tacr1	0.0779917	-1.11891
Ero1l	0.0783282	0.575383
Ptk6	0.0786937	1.40678
Fer	0.0786937	-0.423548
Hpdl	0.0793483	0.94978
Slc6a3	0.0793483	3.8579
Cacnb1	0.0797192	-0.854715
Kcnn3	0.0797192	-1.19482
Pdzrn3	0.0797192	-1.04775
Vav1	0.0797192	0.895708
Cacna2d3	0.0802379	-1.25827
Slc22a17	0.080326	-1.08918
Ptprt	0.0803802	-1.84887
Cd82	0.0809507	0.582736
Stk32c	0.0812159	-0.942921
Rab34	0.0816345	-0.903467
Cachd1	0.0823864	-0.966877
Gna11	0.0829192	0.658688
Ppic	0.0830677	-0.978739
Nsmaf	0.0837602	-0.517979
Hsf4	0.0852003	1.15685
Slc43a3	0.0852003	-0.881565
Rap1gap	0.0852003	-1.18621
Pex3	0.0852003	0.437355
Tead3	0.0852391	-0.359637
Gcat	0.0858237	0.78117
Filip1	0.0858237	-0.740999
Samd11	0.0859561	1.84026
Cbfa2t3	0.0861962	-0.790985
Tagln3	0.087163	-1.83812
Syne2	0.0872988	-0.423617
Myo5a	0.087838	1.01471
Nptxr	0.088188	-1.6739
Wdr93	0.0890541	2.20934
Grik5	0.0890843	-0.91746
Bace2	0.0901625	-1.41397
Rab11fip2	0.0903981	-0.528126
Gls2	0.0910107	1.06703
Park7	0.0910107	0.273598
Fam155a	0.0910107	-2.49623
Tmem219	0.0915335	0.770758
Bmpr2	0.0917211	-0.335675
Nphp4	0.0917211	-2.25705
Nuak1	0.0917628	-0.748933
Syt15	0.0920625	-0.849587
1600014C10Rik	0.0920625	1.18975
Dnmbp	0.0928452	-0.23064
Ano4	0.0934083	-6.14203
Gpr173	0.0934083	-2.51722
Itga9	0.0936441	-0.971245
Nsg1	0.0952675	-1.20162
Gm14207	0.0952675	0.659226
Flt3	0.095294	1.24353
Nt5dc2	0.0965453	-1.2805
Pltp	0.0966143	-0.859245
Clcf1	0.0972373	1.29074
Fam65b	0.0972883	1.24375
Ubash3b	0.0976342	-0.598972
Fbln2	0.0987884	-1.28343
Slc38a3	0.0996002	1.67058
Wdr86	0.100302	-1.29944
Evc	0.101118	-0.641339
Limd2	0.101118	1.02795
Ifitm10	0.104731	3.46851
Adam9	0.104799	-0.526471
Pcdh8	0.105177	-3.45021
Pde7a	0.105721	-0.475552
Fam13c	0.105721	-1.27457
Cdyl2	0.105946	-1.11961
Enpp7	0.106213	4.06847
Limch1	0.106366	-0.874863
Rab13	0.106907	-0.653849
Shpk	0.106907	0.812128
Tmem171	0.106907	-1.63785
Atp8b1	0.107735	0.430308
Tram1l1	0.10786	-2.30105
Zfp516	0.108775	-0.916103
Epha5	0.108775	-4.22263
Msmp	0.110354	4.59365
Fndc4	0.11069	-1.34319
Epn2	0.111283	-0.66181
Bend6	0.111283	-1.79944
Glud1	0.111566	1.18289
Slc17a8	0.111566	-1.47667
Slc12a4	0.111566	-0.545807
Kmt2c	0.111566	-0.210399
Cebpb	0.111566	0.570118
Mtch2	0.111965	0.6608
Nmu	0.114874	3.44383
Klf15	0.114874	2.0251
Cdc42bpa	0.114874	-0.943387
Wipi1	0.114962	-0.537425
Edem1	0.115019	0.377111
Chdh	0.116212	0.870958
4930452B06Rik	0.116389	-2.93831
Sgsm3	0.117638	-1.33058
Rapgef3	0.118559	-0.893232
Prkd3	0.118567	-0.858693
Adam23	0.119509	0.761468
Tspan33	0.119675	-1.62506
Slc18b1	0.120804	0.70924
2010001E11Rik	0.120853	2.11437
Tenm4	0.120853	-0.681601
Etl4	0.122538	-0.620113
Palld	0.122628	-0.368975
Kcnma1	0.122797	-1.42722
Arfip2	0.124382	0.386034
Zcchc11	0.124382	-1.37074
3110040N11Rik	0.124382	0.363264
Elp5	0.124815	0.396917
AI846148	0.126906	-0.472929
Nek6	0.126906	0.498755
Mcc	0.126907	-1.49258
Scnn1b	0.127391	-5.07692
Sv2c	0.127826	-1.50217
Adamts18	0.128357	-2.14557
Rictor	0.129555	-0.327922
Klra3	0.130018	3.51323
Etohd2	0.130018	1.27178
Steap2	0.130018	0.664554
Lgi2	0.130565	-1.78714
Esrp1	0.130904	-1.18992
Zfp558	0.132084	-1.10463
Cyp4f39	0.132155	1.26628
Smc5	0.132646	-0.394768
Layn	0.133364	-1.44867
Ficd	0.133433	0.34004
Gpr162	0.133669	1.52234
Ndufa12	0.134245	0.385621
Nmnat2	0.135219	-1.36813
Pax9	0.135589	4.78876
Odf2	0.135864	-0.454017
Cap2	0.135864	1.31264
Nexn	0.135864	-1.05619
Rgma	0.135864	-1.94455
Sox7	0.136245	-1.16091
Fxyd6	0.136245	-1.13295
Zmynd8	0.136245	-0.376944
Mcemp1	0.136245	2.88864
Clip1	0.136245	-0.443398
Dact1	0.136412	-0.962858
Fchsd2	0.136896	0.406402
Zfp28	0.137348	-0.963941
Smo	0.137773	-1.25438
Cox4i1	0.138104	0.263424
Kcnmb1	0.138579	-1.58381
Cd1d1	0.139009	-0.98387
Mapk11	0.139009	-0.988329
Ppp2r2c	0.141602	1.58185
Syt2	0.142437	-3.43005
Dand5	0.142467	0.755376
Adam6b	0.142467	3.59968
Meis1	0.142467	-1.09204
Rasd2	0.14366	0.64854
Msantd3	0.145334	-1.35353
Lrfn1	0.145502	-1.85002
Runx1t1	0.145689	-0.656695
Bcl11b	0.145689	0.50265
Rsf1	0.145689	-0.248443
Nfat5	0.146237	-0.477279
Cobl	0.14637	0.623943
Nid2	0.146632	-1.02174
Ndufv1	0.146632	0.324502
Pkia	0.14664	-0.910666
Emilin3	0.14664	-3.69143
Il7	0.14664	-1.20024
Gca	0.146668	0.455784
Rasgef1b	0.147176	-0.960808
Slc27a4	0.14722	1.34345
Chd6	0.14723	-0.382847
Cisd3	0.14723	0.293603
Coro1a	0.147605	1.19762
Zfp687	0.147605	-0.246199
Zfp819	0.147665	2.17231
Cnr2	0.147665	2.04106
Col13a1	0.148924	-1.16276
Prkaa1	0.148999	-0.777339
Runx1	0.148999	-0.608122
Icosl	0.148999	0.54883
Kctd18	0.148999	-0.632956
Zfp280d	0.148999	-0.325825
Msi1	0.149141	0.866298
Uqcr11	0.150709	0.338366
Atxn2	0.150709	-0.347039
Mrps16	0.150709	0.387684
Lef1	0.151074	1.62018
Camta1	0.152461	-0.835735
Als2	0.152461	1.35425
Trim62	0.153147	-1.02867
Slc43a1	0.153147	-0.842113
E2f3	0.153536	0.470776
Gm16702	0.154219	3.86148
Acot12	0.155345	1.50444
Igfbp4	0.155345	-0.693962
Adcy5	0.156502	-0.774019
Reln	0.157621	1.19876
Cercam	0.157621	-1.0042
Banf1	0.157858	0.262903
Nkiras1	0.158211	0.682014
Stkld1	0.158572	1.94538
Larp1b	0.159894	0.640839
Calml4	0.161002	0.77098
Npr1	0.162742	-0.729935
B4galt3	0.164488	0.275073
Fam163a	0.164491	-3.3587
Klhl14	0.164867	3.05469
Wscd1	0.165168	-1.07402
Ptpn23	0.167996	-0.384888
Ak3	0.170159	0.504346
Wbscr17	0.170159	-2.01441
Armc6	0.170159	0.472017
Ltbr	0.170657	0.524352
Pak6	0.170657	1.16457
Lcat	0.170657	-2.01725
Hoxd9	0.170657	-4.76406
Slc46a3	0.170692	1.49428
Mrps23	0.171061	0.315762
Tmem208	0.171691	0.34475
Aldh1a3	0.171691	-0.492289
Insrr	0.171691	1.34211
Dyrk1b	0.171691	-0.353353
Flt1	0.171691	-0.791647
Prr5	0.171825	0.451758
Mapk15	0.171986	-1.48863
Slc16a3	0.173091	0.96717
Commd4	0.173184	0.377534
Lpcat4	0.174226	-1.22396
Kif26b	0.174249	-1.57173
Mb21d2	0.174479	0.289549
Cmip	0.174796	-0.327157
Dlg5	0.175543	-0.58121
Zfp821	0.175543	-0.851276
Kif1a	0.175676	-1.68368
Arl4c	0.175676	0.856396
Foxd3	0.178353	-1.60461
Uchl1	0.17861	-1.18389
Abca2	0.17869	0.836717
Camkk1	0.179149	-1.0438
Fam193a	0.179869	-0.262688
Amigo2	0.179869	-1.03164
Tom1l1	0.179869	0.297661
Sugt1	0.181187	0.224385
Gm5617	0.181864	-0.755049
Gdap1l1	0.182532	-1.56288
Scp2	0.183351	0.897189
Cadps2	0.183351	-0.477009
Tmem51	0.183943	0.46609
Bcl6	0.183943	0.449827
Hip1	0.183981	-0.788852
Gpr132	0.183981	1.15522
Coa6	0.184347	0.470255
H1fx	0.184532	-1.72908
Dgkz	0.185997	0.185881
Snap91	0.186059	-1.4964
Ctsf	0.186373	-1.34689
Prelid1	0.18694	0.383489
St3gal4	0.18694	1.32071
Atp10a	0.18694	-0.851565
Nbea	0.187394	0.545543
Uhrf2	0.188825	-0.732001
Mageh1	0.190411	-1.07614
Ch25h	0.190411	-1.17808
Chpf	0.190707	-0.764255
Ndufa13	0.191015	0.337372
Zfp672	0.192414	-0.278251
Slc35c2	0.192607	1.08671
Pik3cb	0.192922	0.207217
Dnajc22	0.192922	0.383324
Mrpl48	0.193624	0.230133
Pnmal2	0.193624	-1.75771
Pamr1	0.193624	-0.696644
Dstyk	0.193624	-0.385897
Plekha7	0.194123	-0.349291
Smad1	0.194775	0.393121
Foxe1	0.196899	5.30586
Tmem170	0.197654	0.52157
B630005N14Rik	0.197654	-0.574562
A430105I19Rik	0.199207	-1.22025
Mmp17	0.200582	-0.948427
Dock3	0.202789	1.46036
Kcna3	0.203478	1.3607
Ctxn1	0.204264	-1.03521
Klf11	0.205019	-0.512807
Ubn2	0.205268	-0.318183
Ptgr2	0.205268	0.425546
Sash1	0.205268	-0.492461
Kmt2a	0.205268	-0.424751
Fgfrl1	0.205268	-1.52973
Ctnnd2	0.205268	1.03164
Tesc	0.205268	-2.05133
Eif2a	0.205446	0.276583
Pcdhgc3	0.205512	-1.03729
Dok3	0.205512	1.20045
Atp2c2	0.205512	-0.877486
Ubac2	0.205512	0.419413
Tmem178b	0.205868	-2.34241
E130307A14Rik	0.205906	-0.463366
Prkcq	0.206608	1.06217
Synj2	0.206916	-0.954547
Rell1	0.206916	-1.00521
Snap25	0.206916	-0.686432
Zfp384	0.207865	-0.217594
Zbtb46	0.209007	-0.782949
Arhgef37	0.209887	-0.924721
Tex261	0.210208	0.312229
Tmem2	0.210208	-0.333064
Sorcs3	0.210208	-2.20768
Arih1	0.210208	-0.401595
Kcng3	0.210208	1.03251
Sim2	0.210208	3.01033
Capn2	0.211304	-0.987323
Cacna2d2	0.211424	-1.12564
Peg12	0.211424	-1.60863
Kctd12	0.212659	-0.897351
Sntb2	0.213647	-0.540932
Gata2	0.213647	-0.955197
Mast4	0.213647	-0.451192
Plekha3	0.213647	-0.477989
Kif6	0.213882	-1.70466
Wnt5b	0.213987	0.918101
Skap2	0.214244	0.843273
Reep6	0.214244	1.23196
Plekhm2	0.214376	-0.289878
Plxna1	0.217153	-0.57235
Malt1	0.217484	-0.259686
Cxcl12	0.218136	-0.77736
Mtf1	0.218485	0.407658
Kif19a	0.218485	1.49443
Nae1	0.218485	0.347119
Fchsd1	0.218494	-0.518997
Ntf3	0.220266	-1.11964
9330162012Rik	0.220927	0.501207
Cuta	0.221285	0.251913
Gpr83	0.221285	2.89274
Ric3	0.221285	-1.44257
Cntn2	0.222681	4.22857
Pdxk	0.222773	1.05474
Smim7	0.222773	0.247014
Slc37a1	0.222773	-0.444114
Fbxo36	0.223189	-0.600831
Fbxl13	0.223733	-2.29652
Tma7	0.223733	0.442317
Plekhd1	0.223733	-0.930398
Irf5	0.223733	0.730822
Tmem68	0.223733	0.302205
Adgrb2	0.224382	-1.94666
Slc38a1	0.224382	-0.582558
Wdr26	0.225347	-0.404391
Tmeff2	0.225534	-2.31898
B130024G19Rik	0.226493	-1.55089
Slc9a2	0.22695	-0.493409
Rgs19	0.22695	0.660968
Col4a4	0.227118	-1.42778
Tnni2	0.227118	-1.18959
Man1c1	0.227418	-0.433725
2310007B03Rik	0.227753	-0.461132
Ero1lb	0.228333	1.07873
Psmb6	0.228335	0.276653
Nedd4	0.228799	-0.748732
Hdhd3	0.230286	0.795095
Olfm1	0.230335	-0.57356
Cers2	0.230637	0.5493
Lnp	0.231363	0.44946
Dagla	0.231498	-0.636768
Pan3	0.231498	-0.251449
Abcb9	0.232258	0.624259
Dock6	0.232258	-0.364185
Rgs6	0.232533	-1.03215
Mcfd2	0.232533	0.821953
Arhgap39	0.232533	-0.938591
Tecpr1	0.23362	-0.393499
Klf9	0.234138	-0.583772
Dlgap4	0.234138	-0.329491
Zmym4	0.234138	-0.586359
Rhpn1	0.234788	-3.29792
Zbtb16	0.234788	-1.29921
Nipal2	0.236448	-0.738001
Cdh22	0.239389	3.9434
Kcnq5	0.239389	1.2185
Phb2	0.240705	0.330239
Kcnb1	0.240705	-0.820618
Gmpr	0.240705	-0.835533
Rnf121	0.240705	0.369192
Trerf1	0.240705	-0.618751
E330020D12Rik	0.240705	1.44833
Abcc4	0.240705	-1.05149
Rtkn	0.241448	0.592221
Rbp4	0.241807	-0.831812
Abcc6	0.241987	1.19498
Ltbp2	0.242083	1.45058
Cacna1c	0.242438	-0.664381
Dffb	0.242452	0.453474
Ndrg2	0.243009	-0.804538
St8sia2	0.243009	-3.17803
Rgs7	0.243009	1.18084
Nup62cl	0.243927	-2.12798
Rap2a	0.24415	-0.755472
Zfp706	0.244916	0.18052
Klhl23	0.244916	-0.481184
Ak5	0.244916	-2.48888
Gfpt2	0.244916	-0.99506
Ttc13	0.245281	0.246173
Wnt9a	0.245281	-0.961959
Vac14	0.245281	0.199528
Prom2	0.245519	3.99562
Scap	0.245519	-0.223247
Dynll1	0.245519	-0.719475
Anapc13	0.245519	0.267041
Zfand2b	0.24608	0.232238
1810041H14Rik	0.246486	1.19862
Hfm1	0.24839	-3.63532
Mief1	0.24839	0.366083
A330074K22Rik	0.24839	-2.54654
Tex40	0.24839	2.68272
Plekha5	0.249768	-0.623952
Atl1	0.250459	-0.823378
Nck2	0.253026	-0.290487
Bptf	0.254718	-0.185423
Phf2	0.254718	-0.336834
A430005L14Rik	0.254718	0.452018
Zic2	0.254718	4.01196
Mllt4	0.254718	-0.274544
Il6ra	0.254718	-0.491401
Mansc1	0.254718	-0.998995
Zfpm2	0.254718	-1.47081
Arl5b	0.254718	-0.766919
Clgn	0.255546	1.85097
Rtn4rl1	0.255769	1.06601
Ppara	0.255831	0.902608
Atrn	0.255831	0.686932
Cntfr	0.255831	-1.48399
Abcc8	0.255831	-0.646769
Snx13	0.256788	-0.236273
Rnf5	0.25725	0.368357
St3gal2	0.257986	-0.434642
Msantd2	0.259621	-0.376416
Rnf44	0.259621	-0.288025
Fam110b	0.259815	-0.939472
Trim25	0.260747	-0.432457
Ttll1	0.261679	-0.606355
Hexb	0.261679	1.11328
Dll3	0.263495	-2.53914
Sphk1	0.263495	1.16085
Rgl3	0.263725	-0.669879
Pparg	0.264484	-0.812927
Cryba2	0.264837	-1.15941
Crtac1	0.265603	-2.23669
Kazn	0.266917	-0.706063
Cyb5r2	0.268249	3.83363
Slc25a30	0.269248	0.672897
Atp5g3	0.271176	0.422612
Phf13	0.271307	-0.437909
AI317395	0.271457	1.18051
Plcb3	0.272122	0.482331
Cmbl	0.272396	0.563697
Gprin1	0.272396	1.15183
Slc2a8	0.272986	-0.42492
Foxa2	0.273004	-1.03878
Prdx1	0.273004	0.508315
Pde8a	0.274911	-0.703479
AI413582	0.275809	-0.496079
Ano10	0.275809	-0.483053
Slc18a2	0.275936	1.74041
Lamc2	0.276638	-0.778608
Tjp1	0.276638	-0.360109
Bnc2	0.278331	-1.35919
Smtnl2	0.278331	-1.26098
Fam136a	0.278331	0.2185
Flnc	0.27861	-1.2774
Ccdc77	0.27861	-0.320058
Tnrc6c	0.27861	-0.269092
Ankrd6	0.278896	0.598982
Dvl3	0.278896	-0.297607
Prkag1	0.2798	0.240463
Gnao1	0.2798	-0.783743
Zfp641	0.280178	-1.30183
Sike1	0.281795	0.178202
Arhgap1	0.282525	-0.294131
Carhsp1	0.282902	-0.279273
Dmrt2	0.282902	2.70919
Tmem52	0.282914	1.77251
Ndufb9	0.283853	0.309044
Foxred2	0.283853	0.68007
Map3k3	0.283853	-0.344173
Galr1	0.283853	-1.69306
Cyr61	0.283853	-0.737528
B3galt4	0.283853	0.42839
Nova2	0.283853	-0.972162
Aif1l	0.284007	-1.41509
Gdnf	0.284007	-0.777771
Hoxd11	0.28415	-5.78447
Crebzf	0.284418	-0.278701
Gt(ROSA)26Sor	0.284492	-0.427382
Abhd17a	0.284492	0.520026
Mst1r	0.285175	-0.265444
Nipa1	0.28567	-0.678341
Hjurp	0.285753	0.454599
Ccdc64b	0.285929	-0.451996
Bin1	0.286253	0.635156
Vipr1	0.286969	0.391614
Gsn	0.287284	-0.72583
Gabrd	0.287284	1.35443
Btbd10	0.287415	-0.436762
Psmc3ip	0.287976	0.922566
Pink1	0.29006	0.34861
Nos1	0.290475	-2.01538
Matn4	0.291356	-1.81559
Kctd20	0.294411	-0.39271
Gm10037	0.294784	-4.40284
Rabif	0.297891	0.217014
Lpar3	0.299286	-1.16984
Osgin2	0.299286	-0.562414
Phf19	0.299778	-0.82538
D8Ertd82e	0.300236	-0.334201
Brd3	0.300401	-0.316439
Pou2f2	0.300401	1.12762
Mtx1	0.301411	0.251829
Pgc	0.301495	1.39518
Pllp	0.302451	-0.732127
Ap1m1	0.302985	0.396123
Hoxa6	0.303461	1.2561
Scgn	0.304041	-0.646922
Lysmd2	0.304041	-0.658873
Gm2694	0.304041	-2.54212
Rmdn3	0.304041	0.75374
Ap5s1	0.30513	0.411808
Icmt	0.305393	0.30461
Tfeb	0.305546	0.340993
Emc2	0.305864	0.265015
Cox20	0.307201	0.283852
Kmt2b	0.307596	-0.278328
Mier1	0.307707	-0.564694
Aimp2	0.307892	0.402714
Plcd3	0.308611	-1.24422
Tnfsf14	0.308611	1.14724
Zfp691	0.309261	-0.527685
Clstn2	0.310166	-1.27187
Epor	0.310651	-1.03039
AI464131	0.31382	0.661709
Parp6	0.313853	-0.31379
Nipal3	0.313981	-0.404689
Nfil3	0.315193	1.50226
Ppp1r1b	0.315193	0.56874
Prep	0.31601	0.280442
Endou	0.316151	1.0229
Bik	0.317582	-1.13769
Rasef	0.318938	-0.563633
Hdhd2	0.319367	0.248814
Cldn23	0.319367	-0.494558
Slc25a28	0.319367	0.708146
Lgr5	0.319729	-0.961208
Kcnh8	0.320625	-1.78788
Dnah9	0.320625	-0.737113
Ppp1r1a	0.320625	1.29203
Nagk	0.320625	0.266451
Abcb10	0.320736	0.443174
Rims2	0.320991	0.66601
Galnt1	0.321929	0.406232
G3bp2	0.322443	0.147863
Zfp651	0.322909	-0.557661
Adamts20	0.322909	-2.08458
Gm16793	0.322909	-1.59479
Prpf6	0.323069	0.253816
Palm	0.32456	-0.570871
Pstpip2	0.324782	0.452014
Mapre2	0.324782	-0.487283
Sdhaf1	0.324782	0.339801
Hp1bp3	0.324782	-0.20711
Sumo3	0.324782	0.289581
Fbxw17	0.324782	-0.400542
Hnrnpf	0.324782	0.164018
Ppp2r5e	0.325212	-0.509167
Cyp2r1	0.325212	0.984914
Lingo3	0.325676	3.05991
Krtcap2	0.326075	0.322666
Arid5a	0.326743	-0.875835
Arhgef10l	0.326795	-0.917532
Itpripl2	0.328753	-0.971185
Syt16	0.329192	-1.06136
Plekhd1os	0.329876	-1.04917
Prdm2	0.329876	-0.222088
Tmem184a	0.329876	0.737821
1010001N08Rik	0.329965	1.08555
Rbbp6	0.330496	-0.170277
Itga8	0.330496	-1.01334
Lztfl1	0.330953	-0.418891
Abi2	0.331025	-0.360969
Ppp1r35	0.331266	0.284926
Tbc1d8	0.331854	0.515853
Abcc5	0.332409	-0.525427
Pdp1	0.333187	-0.558801
Zfp119b	0.333216	0.331229
Immt	0.334171	0.248941
Ucp2	0.334598	-0.612664
Lats2	0.335133	-0.3172
Scn5a	0.336045	-1.13873
Sqrdl	0.336061	-0.794954
Ica1l	0.337184	1.77267
Ebpl	0.337184	0.409635
Spata2	0.337244	0.355072
A330009N23Rik	0.337244	-1.41144
Vamp2	0.337244	-0.299392
Pcsk7	0.338536	-0.496631
Kcnmb4	0.339196	1.50314
Eef1e1	0.339306	0.399553
6030419C18Rik	0.339356	0.897294
2210011C24Rik	0.340018	-0.501126
Ago4	0.340328	-0.8449
Trmt6	0.340328	0.246903
Ptpn12	0.340422	-0.402376
Arl14ep	0.340422	-0.266832
Nkx6-2	0.340438	3.07089
Lrba	0.340728	0.24226
Rspo4	0.340728	1.45299
Rnd2	0.341586	0.85568
Kcnh2	0.341586	-0.692651
Nradd	0.342412	-0.762721
4921536K21Rik	0.343597	-1.78432
Nudt16	0.345445	-0.355393
Icam1	0.345543	0.498427
Sf3b2	0.347164	0.154977
Shisa7	0.34767	1.69471
Stau2	0.348268	-0.265451
Aldh1l1	0.348268	0.737227
Igsf9b	0.348668	-0.738184
Pou4f1	0.348869	1.17275
Dusp14	0.348869	0.825709
Alpl	0.348877	-0.965125
Grid1	0.34904	-1.49454
Pwwp2b	0.349788	-0.559572
Rhot1	0.349979	0.156107
Sfi1	0.350179	0.445015
Snn	0.350339	0.921221
Fam78a	0.350339	0.810597
Ncstn	0.351545	-0.191508
Cdc42ep4	0.352246	0.256675
Robo3	0.352274	-1.02802
Rnf214	0.352824	-0.239407
Rfx1	0.352824	-0.273749
Gfra3	0.352824	-0.830726
Nebl	0.352824	0.84631
Gpc1	0.352824	-0.715996
Dusp4	0.352824	-0.320207
Arhgef10	0.352824	-0.351684
Esr1	0.352824	0.44203
Kif21a	0.353063	-0.746128
Rffl	0.353224	-0.571474
Foxred1	0.353729	0.203768
Tle1	0.353729	0.307408
Flt4	0.353729	-0.57054
Isl2	0.35374	1.4821
Pla2g6	0.35374	0.47724
Npy	0.35374	-1.57863
Cabp7	0.354035	2.26412
Fam210a	0.354202	0.366391
Appbp2	0.354756	-0.335135
Pip4k2a	0.355639	-0.352289
Arf4	0.355639	0.228169
Pkdcc	0.356669	-0.706153
0610010F05Rik	0.358111	-0.432637
Ociad1	0.358111	0.315013
Grik3	0.358111	-0.983015
Zc3hc1	0.358205	0.21353
Dusp1	0.358205	-0.427555
Tmem8b	0.358819	-0.808596
Chmp6	0.360119	0.156991
Etfa	0.360119	0.336748
Spon1	0.360119	-0.848848
Gatm	0.360277	-0.718055
Ldoc1l	0.360277	-0.710522
Snapc3	0.360293	-0.325282
Slc30a1	0.360293	-0.540384
Wdr60	0.360293	-0.522115
Satb1	0.360792	1.05603
Abcf2	0.360932	0.286853
Zfp451	0.360932	-0.453639
Dapk3	0.362035	0.190994
Rnf38	0.362035	-0.440673
1700028K03Rik	0.362169	1.40596
Adal	0.362507	0.328991
Podn	0.362507	0.976366
Syndig1	0.364777	-3.33517
Cops2	0.365143	0.212737
Gxylt2	0.365143	-2.47198
Pptc7	0.365386	0.16897
Ppp2r2a	0.366091	-0.558661
Smad5	0.36694	0.330534
Plekhj1	0.36694	0.212946
Glg1	0.367528	-0.279136
Rcor1	0.368468	-0.424154
Insc	0.368985	0.465208
Hsf2	0.368985	-0.386637
Fut8	0.368985	0.37931
Shd	0.369022	-1.28941
Gramd2	0.369365	0.799707
Asic3	0.371872	0.916754
Unc5a	0.372697	-0.610841
Fndc5	0.373546	0.60224
Lpcat2	0.373962	-0.759293
Pdgfa	0.373962	-0.304185
Ush1g	0.373962	1.42778
Oaz1-ps	0.37636	0.386645
Ngfr	0.376688	-0.779078
Sf3b6	0.376812	0.160011
Fmnl3	0.376919	-0.59612
Tcf20	0.376919	-0.118367
Armc3	0.376933	-2.92033
Med1	0.377616	0.169437
Fosl2	0.377616	-0.336044
Gm15941	0.377616	-0.749951
Rbm44	0.377616	1.60188
Tmcc3	0.377616	-0.508525
Ammecr1l	0.377616	-0.175912
Wdr25	0.37828	-0.412137
Pld1	0.378476	0.222517
Nudt3	0.378476	0.259572
Lrrc23	0.37856	-1.2874
Lrrc75b	0.378983	1.26999
9530052E02Rik	0.382142	1.22974
Wdfy3	0.383557	-0.246
Crybb1	0.383557	-2.60837
Unc5c	0.383557	-1.37561
Trdmt1	0.383557	0.445385
Ppm1b	0.38394	0.282103
Fcgbp	0.38908	0.380545
Fam63b	0.39036	-0.194142
Emg1	0.390627	0.318565
4930539J05Rik	0.390824	-0.432529
Cog5	0.390824	0.30913
Ebf4	0.392725	-1.25377
Ctnna2	0.392821	-2.29547
Hexa	0.392821	0.406315
Kctd7	0.392821	-0.615919
Ctsz	0.392821	0.697446
Slc25a13	0.393164	-0.337427
Sec13	0.393199	0.555848
Trhde	0.393964	-1.14649
Psma7	0.394273	0.212211
Tmem39b	0.394311	-0.428626
Copb2	0.394994	0.319057
Mamstr	0.395827	-1.22599
Jph1	0.39588	-1.2509
Mtap7d3	0.396321	-1.4384
Rbm33	0.396321	-0.220496
Myrip	0.396321	-0.819626
Scn4b	0.396321	2.24281
Med13l	0.396679	-0.309644
D430019H16Rik	0.397643	-0.825368
Slc44a1	0.397643	-0.428167
Snrnp200	0.398102	0.180802
Mcm10	0.398122	0.205087
Cntn1	0.398644	-2.05117
Pex12	0.398772	0.340772
Tram1	0.399328	0.269736
Pex16	0.401093	0.504699
Cd2bp2	0.40139	0.233805
Otogl	0.40139	-1.70741
Azin2	0.402206	1.34093
Lrp2	0.404284	1.67002
Wdtc1	0.404426	0.442887
Slc38a2	0.404426	-0.576656
Tspan14	0.404629	0.406834
Lmf2	0.404882	0.193163
Naglu	0.40497	0.359063
Cul9	0.405248	-0.359403
Rnf114	0.405248	0.313324
Zmym5	0.405248	-0.199205
Pvrl1	0.405248	0.501913
Lrrc7	0.405248	-1.6594
Ebf3	0.405248	-1.01865
Erbb2ip	0.405248	-0.281255
Dock4	0.405248	-0.672451
Mon1a	0.405248	0.37187
Tmem200b	0.405248	-0.499235
Nap1l4	0.405248	0.154619
Tmem150a	0.405248	0.600643
Srf	0.40589	-0.213792
Igfbp2	0.40589	-1.72308
Cd3eap	0.40589	0.552614
Pianp	0.406027	-0.576463
Eif4a2	0.406869	0.303908
Wbp1	0.406869	0.286949
Il6st	0.407162	-0.368847
Cerkl	0.407502	-0.881937
Ptgfr	0.40802	-3.45014
Galnt3	0.40802	-0.335811
Synj1	0.40802	-0.289922
4930426L09Rik	0.40802	-2.03497
P4hb	0.40802	0.747207
Adora1	0.40802	-0.860243
Mtl5	0.40802	-0.887653
Mal2	0.40802	-0.297327
Prkce	0.40802	-0.279151
Dync1li1	0.40802	0.336157
Atp2b1	0.40802	-0.824889
Slc30a9	0.409722	0.160853
Gm4285	0.409995	0.381161
4921531C22Rik	0.410936	-0.461857
Cdh26	0.410936	-0.660999
Lrrk2	0.410936	-0.651569
Srebf1	0.411449	0.465836
Epg5	0.414812	0.321239
Pop5	0.415009	0.369068
Nacc2	0.41607	0.274842
Zfp41	0.416197	-0.428513
Kifc3	0.41643	0.557989
Fam131b	0.41643	-2.403
Nckap5	0.416678	0.323014
Siah2	0.416678	0.288361
Gmds	0.419177	-0.265675
Tmem25	0.420499	0.493273
Prmt2	0.421936	-0.38284
Zswim8	0.422019	-0.187411
Dhfr	0.423458	0.550507
Ybx1	0.423725	0.152268
Riok1	0.424942	0.181079
5730420D15Rik	0.424942	-0.577836
Smg1	0.424942	-0.185912
Usp46	0.425203	-0.417493
Nwd1	0.425592	1.77505
Crot	0.426113	0.774634
Rab31	0.427155	-0.501616
AU040320	0.427155	0.527323
1110008P14Rik	0.427155	0.221853
Pde4dip	0.427155	0.375495
Taok1	0.427203	-0.191376
Sik1	0.427203	0.47956
Rassf1	0.427203	-0.286169
Gmcl1	0.427252	0.277232
Itpr1	0.427861	0.287448
Tpd52l1	0.427861	-1.11407
Ccbe1	0.429162	-1.13566
Phpt1	0.429162	0.438049
Glb1	0.429162	-0.233135
Lipe	0.429629	0.890542
Lonrf2	0.430919	-1.45342
Elf1	0.430919	0.234686
Erlin2	0.430919	0.270106
4930506C21Rik	0.432303	0.830837
Acan	0.432552	-1.29354
Ndufaf3	0.433196	0.207479
Serp2	0.434057	-0.719654
Tprgl	0.435148	-0.344551
Fem1b	0.435472	0.205874
Hells	0.435472	0.393071
Dcaf11	0.435472	0.291557
Rabl2	0.435472	-0.51106
Pik3r5	0.435517	0.34605
Rad9b	0.435857	0.458685
Cope	0.437094	0.304644
Ccdc64	0.437412	-0.525964
E030013I19Rik	0.438354	-1.49423
F930015N05Rik	0.438972	-2.75188
Large	0.439062	-0.358599
Plekhb1	0.439062	0.822489
Pura	0.439445	-0.186736
Arhgef7	0.441548	-0.292611
D930048N14Rik	0.443511	-0.382246
Pygl	0.443573	-0.279811
Fam76a	0.443573	0.283764
Hnrnpa3	0.44392	-0.257082
Pikfyve	0.444101	0.179508
Lrrc3	0.444723	1.01747
Wnt2b	0.446077	-0.390112
Pknox1	0.446077	0.161311
Abhd17b	0.446879	-0.430174
Rpl36al	0.447407	0.17968
Sypl2	0.447469	1.46945
Utp15	0.447469	0.361625
Gsto1	0.448503	0.563534
Ankrd33b	0.448896	0.680539
Slc19a2	0.44996	0.488977
Slc5a4a	0.45049	1.39798
Stx11	0.451262	-0.466214
Zfp945	0.451915	-0.353331
Ddx54	0.451915	0.210162
Celsr3	0.451915	0.544722
Idnk	0.453198	0.407905
1810010H24Rik	0.453322	0.499144
Hoxa11os	0.453752	-3.89685
Tob1	0.45407	0.451106
Ckap4	0.45407	-0.763285
Sdhaf3	0.455978	0.480721
Arfgef1	0.45678	-0.173331
Uqcrc2	0.457328	0.25067
Krtcap3	0.460566	-0.247496
Slco4c1	0.460566	-1.58454
Mdfic	0.460566	-0.403084
Zc3h3	0.460806	-0.317476
Epas1	0.460806	-0.301113
Tmem117	0.461168	-0.31653
Fzd6	0.461177	-0.469893
Psmc4	0.461657	0.167679
Man2a1	0.462003	0.164186
Vegfc	0.462118	0.325681
Specc1l	0.464352	-0.264809
Nr4a2	0.465572	-0.689275
Ecel1	0.465572	-2.29659
Mga	0.465572	-0.235031
P4ha2	0.465572	-0.784591
Klf3	0.465572	-0.219905
Smoc2	0.465572	0.379378
Ptgis	0.465572	0.73672
Lhx5	0.465572	0.73699
Rassf7	0.465572	0.197659
Plekhg4	0.46572	-0.790238
Lsr	0.46572	0.528021
Sec24d	0.46572	0.737168
Myg1	0.46572	0.211622
Smim19	0.46572	0.236975
Kcnh6	0.46572	-0.520486
Creb3l4	0.465951	-0.752698
Gsr	0.465951	0.346427
Spata24	0.465951	-0.581969
Mtmr2	0.465951	0.154609
Mrps18b	0.465951	0.24572
Nim1k	0.465951	-0.780589
Asic1	0.465951	0.766785
Aldh1a2	0.465951	-0.612566
Fbxo7	0.466064	0.266121
Hoxb13	0.46685	1.16177
Higd2a	0.467567	0.318818
Adam33	0.46839	-0.861284
Lrrc10b	0.469236	-1.10219
Rps6	0.472881	0.306909
Rcl1	0.472881	0.343931
Tmem65	0.473171	-0.200979
Trib2	0.474013	-0.595203
Ubxn8	0.474127	0.265623
Cnpy3	0.474127	0.184154
Mkks	0.47448	0.2831
Top2b	0.474576	-0.189344
Fam120aos	0.474576	0.285996
Ndnl2	0.475672	0.258522
Nars2	0.476478	0.318406
Depdc5	0.47743	-0.204445
Tmem57	0.477453	0.252349
Klhdc3	0.478084	0.257951
Ptprj	0.479276	-0.34167
Nolc1	0.479544	0.439308
Use1	0.479544	0.209
Tll1	0.480185	-0.709414
Pias1	0.480185	-0.157605
Sptbn4	0.480185	-0.714417
Zfhx2	0.480837	-0.466463
Dpy19l1	0.481612	0.173993
Ebf2	0.48178	-1.74642
Phactr4	0.481946	-0.202204
Limd1	0.482028	0.176806
Spryd3	0.483546	0.272533
Eif4g3	0.483736	-0.260154
Ndnf	0.486328	-1.4297
Alox15	0.486328	-1.13303
Mthfd2	0.486328	0.377186
Sfrp5	0.486328	1.41505
Gm5464	0.486757	-1.33545
Rarb	0.487444	1.10079
Gm15612	0.487444	-0.814586
Cpeb4	0.488344	-0.295406
BC003331	0.488344	0.29558
Rims1	0.491072	1.25928
Invs	0.491397	0.521463
Acsl6	0.491786	0.83072
Calu	0.492514	0.119126
Fra10ac1	0.492731	0.240116
Nrg2	0.494461	0.6182
Ppp1r3c	0.496131	-0.458884
Tub	0.496131	1.08174
Tmem106b	0.496131	-0.203091
Piezo1	0.497117	-0.413558
Fam19a3	0.498726	0.52438
Rheb	0.498889	-0.184291
Rqcd1	0.502205	0.277145
Mul1	0.503306	0.241927
Dll1	0.503306	0.856278
Shisa3	0.503438	-0.851483
Amdhd1	0.503508	1.89346
Nfkb2	0.50373	0.219362
Vps18	0.50438	0.348131
Mir6913	0.504603	1.36225
Ahnak	0.504885	-0.381049
Dnaaf1	0.504885	0.564528
Btg3	0.505679	-0.724097
Fam227a	0.505728	-0.621653
Arhgef3	0.50576	-0.42911
Slc15a1	0.506144	0.801761
Slc43a2	0.506144	0.962991
Trim36	0.507432	0.191439
Kcnj11	0.507471	-0.793909
Bcap29	0.5081	0.316822
Creld1	0.509953	-0.334962
Rfx2	0.509953	-0.541221
Rmnd5b	0.510274	0.166405
Zc3h7a	0.511982	-0.280847
Gm10125	0.511982	-1.54479
Pcdhga1	0.513616	-0.675541
Cdk2ap2	0.513662	0.48469
Cebpg	0.514218	0.181841
Asun	0.514292	0.167624
Nfe2	0.515675	0.744557
Ercc1	0.516188	-0.203814
Fjx1	0.516825	-1.13184
Whsc1l1	0.518399	-0.122665
Aprt	0.518399	0.245957
Sh3rf1	0.518399	0.211636
Plod3	0.518399	-0.179711
Zfp768	0.518399	0.463169
Adrb1	0.518399	-0.653361
1700016H13Rik	0.518399	-1.48544
Ppp4r4	0.518399	-0.971705
Poldip3	0.518399	0.229589
Npc1	0.518399	-0.52408
1190002F15Rik	0.518399	0.374951
Lnpep	0.518399	-0.215629
Tspan2	0.518399	-0.578645
Wdr83	0.518422	0.220555
Taf13	0.518422	0.175537
Itpr2	0.518422	-0.731214
Znfx1	0.518422	0.341106
Hmga2	0.518422	-0.693651
Tcf12	0.519027	-0.129734
Gm15908	0.520237	1.90194
Fbxo27	0.520237	-0.926894
Rtn4	0.520237	-0.515765
Uba6	0.523033	0.182637
Arhgef18	0.524704	-0.193236
Tnfrsf8	0.524704	0.539358
Llgl2	0.524704	-0.13034
Rsph3b	0.524704	0.264945
Rsg1	0.524704	-1.06133
Kcnj12	0.526387	-1.19467
Mta2	0.526387	0.147559
Pdia6	0.526387	-0.116745
Prrc1	0.526387	0.220519
Lrrn2	0.526437	-1.20794
Arap2	0.527477	-0.234965
Astn2	0.527477	-0.879597
Tdp2	0.528005	0.558467
Ina	0.528005	-1.20748
Pabpn1	0.528543	-0.188029
Fam105a	0.528543	-0.344723
Cdc42ep1	0.528543	-0.504842
Mapk7	0.52911	-0.23626
Ndufaf2	0.530134	-0.17632
Rimklb	0.533994	-2.24758
Wdr82	0.533994	0.216636
Npat	0.534494	-0.291222
Zdhhc7	0.534809	0.430633
Mir1904	0.535316	-0.971482
Cav3	0.537092	-2.73643
Bag4	0.53714	0.340849
Vav2	0.53714	0.620336
Rab11a	0.53714	-0.260842
Atg16l2	0.537231	-0.595319
Hivep2	0.53729	-0.186894
Col26a1	0.53737	-1.62494
H2afv	0.537544	0.403341
Ddo	0.537544	1.16181
Cybrd1	0.538423	-1.93358
Ube2i	0.538741	0.1241
Mir7662	0.538741	-0.626524
Fbxo2	0.538741	1.54906
Inhbb	0.539518	-0.529764
Gid8	0.539644	-0.347417
Cnksr1	0.542484	-0.170937
Dio3	0.544428	-3.48311
Susd4	0.544467	-0.710952
Nr2f2	0.545137	-0.520903
Cog7	0.545137	0.12728
Slc13a3	0.545137	-2.28518
Brd4	0.545712	-0.231374
Plk3	0.545712	-0.637921
Zfp11	0.546096	-0.323264
1700086L19Rik	0.546096	-1.40579
Usp44	0.546096	2.33288
Dhx37	0.546096	0.222217
Eif2s1	0.546096	0.177894
Gsk3a	0.546096	0.315679
Mir7031	0.546337	-1.69641
Alkbh3	0.546337	0.282751
Akap5	0.546337	0.68665
Apc	0.548247	-0.207113
Cd2ap	0.54881	-0.188582
Ddhd2	0.550504	0.612351
Col25a1	0.550504	-0.907032
Lrrc16a	0.550504	0.329985
Ppp1r18	0.551617	0.416268
Nek1	0.551617	-0.431408
Rnf10	0.551617	-0.164668
Wwc1	0.551617	0.299944
Asxl1	0.551617	-0.340966
Tceb1	0.551617	0.172224
Tmem54	0.551617	0.275499
Rpl38	0.551617	0.236904
Tnk2	0.551617	-0.227096
Zfp598	0.551714	-0.150613
Zfp593	0.551986	0.302503
Lrp4	0.552815	0.243062
Slc4a1ap	0.552815	0.15036
Pacsin3	0.552815	-0.905086
Dnajc6	0.553144	0.673523
Nab1	0.553144	-0.29505
Adra2b	0.553144	-1.58409
Usf2	0.554896	0.153422
Dnajc9	0.554896	0.306331
Nphp1	0.554896	-0.409843
Ephb6	0.555223	1.00005
Eno1	0.555223	0.17999
Fbrsl1	0.555275	-0.19606
Pkp4	0.555883	-0.243137
Fli1	0.558886	0.535142
Prtg	0.558886	-0.830737
Snip1	0.558989	0.123581
Rest	0.558989	-0.200308
Wfikkn2	0.559426	-0.96915
Madd	0.560001	-0.198237
Entpd6	0.560001	0.366291
Nrg1	0.560308	-0.649546
Ss18	0.560679	-0.179222
Wdr72	0.560679	1.66854
Jag1	0.560679	-0.329951
Sgk1	0.560679	-0.333616
Rbm5	0.560683	-0.191392
Nrip3	0.560683	-0.455417
Scube2	0.560683	-1.00731
Rgs16	0.560683	-0.728676
Npnt	0.560683	-0.929607
Msl2	0.561196	-0.139797
Ep300	0.561852	-0.145178
Tmem178	0.563315	-0.929551
Samd5	0.563697	-0.55266
Ythdc1	0.563697	-0.139143
Osbpl6	0.563912	0.673317
Txnl4b	0.565726	0.225879
Psmg2	0.566123	0.277312
Slc15a3	0.566692	-0.467454
Kif13a	0.566785	0.230363
Peak1	0.566867	0.42151
Dnajc13	0.567441	0.240412
Slc6a6	0.567626	0.207529
Fam73b	0.567805	0.443246
Eapp	0.567805	0.183469
Cul1	0.567948	-0.189449
P2rx5	0.568527	1.07944
Rnf157	0.56929	0.262752
Tmem70	0.56929	0.181413
Ift27	0.56929	-0.61483
Mphosph8	0.5698	0.183806
Cep192	0.56993	-0.186104
Rbak	0.56993	-0.339131
Poln	0.56993	0.897701
Dnaja2	0.571011	0.162431
Dok4	0.571011	-0.171274
Pkd1l2	0.571011	1.32931
Gpr146	0.57145	0.378467
Galnt2	0.572125	0.473623
Wnt3	0.572125	0.748732
Sft2d2	0.572125	0.171751
Fam126a	0.572125	-0.21354
Mad2l2	0.572895	0.356726
Jade1	0.574471	0.26
Abcf3	0.575178	0.210745
Alox5	0.575178	0.278868
Il11ra1	0.575752	-0.335034
Sntg1	0.576621	-1.59775
Trpm3	0.576621	-0.927547
Plekhs1	0.576621	-0.65314
Sertm1	0.576621	-1.05258
Syndig1l	0.576621	-3.94001
C1d	0.576788	0.220224
Rab4a	0.576788	0.20815
R3hdm2	0.576788	-0.274864
Noc4l	0.577466	0.335069
D16Ertd472e	0.577951	0.467983
Erlin1	0.578076	0.243497
AI987944	0.578076	0.212929
Elmo3	0.578142	0.151204
Plod1	0.578351	-0.248101
Pik3ap1	0.578351	0.496671
Homer1	0.578815	-0.114479
Golt1b	0.579978	-0.287756
Srsf6	0.580212	0.159945
Mat2a	0.580212	-0.565101
Tpm1	0.580384	-0.172394
Nde1	0.580384	-0.308792
Limk2	0.580384	-0.340743
Nmd3	0.580384	0.202563
Inpp4b	0.580559	-0.377623
Nanos1	0.581725	-0.626108
Dpf1	0.582836	-1.63033
Elmsan1	0.582836	-0.29639
Rab3gap2	0.582992	0.212352
Bloc1s5	0.583195	0.19667
Ergic1	0.583598	-0.309457
Htr7	0.584757	0.874635
4932438H23Rik	0.584879	0.409937
Kdf1	0.585121	0.143935
Gphn	0.585121	0.221365
Hibadh	0.585121	0.14654
Fhdc1	0.585121	-0.415926
Dynll2	0.585121	0.376253
Rps20	0.585121	0.27885
Atp1b1	0.585121	0.381895
Grip2	0.585199	2.60613
Sdha	0.585199	0.294811
Cacnb2	0.585199	-0.72904
Ldha	0.585653	0.324926
Kcnip2	0.586961	0.857017
Fus	0.586961	-0.328755
Ank	0.586961	0.538649
Irx4	0.587455	1.82335
Kat8	0.587455	0.258796
Stambpl1	0.587889	-0.166164
Mmp15	0.589985	-0.473131
Nrxn3	0.590007	-1.17166
Dner	0.590607	-0.441739
B4galnt1	0.590658	0.296403
2020-09-10	0.591677	-0.423679
Lmx1a	0.592228	-0.312574
4933421O10Rik	0.592515	0.217155
Hnf4g	0.593043	0.764864
Jmy	0.59349	-0.473627
Hspa1l	0.593992	-1.50403
Rhoq	0.593992	-0.184166
Dnajc15	0.594264	0.148568
Mcoln2	0.594264	0.316449
Ggt1	0.594593	0.840482
C77080	0.594593	0.135152
4930402H24Rik	0.594593	0.553392
B3gnt7	0.594593	0.660035
Pck1	0.594593	0.756396
Atf7ip	0.596215	-0.155018
Efr3b	0.596215	0.818202
Vezt	0.596921	-0.182864
Wipi2	0.597298	-0.189196
Sacs	0.597298	-0.334759
Rere	0.597298	-0.222866
Acbd3	0.597298	-0.263326
Ccdc102a	0.598369	-0.418815
Mag	0.598937	0.620601
Cables1	0.598937	-0.490427
Vash2	0.598937	-0.386714
Nhlrc2	0.601233	-0.160062
Fgf4	0.60135	-1.08416
Derl1	0.601847	0.326704
Utp18	0.601847	0.226618
Stxbp6	0.602558	-0.501018
Prosc	0.602558	0.369725
Prdm15	0.603157	-0.200313
Smoc1	0.603171	-0.225553
Crls1	0.603171	0.1786
Frs2	0.603171	-0.159934
Hnf1b	0.603171	-0.592923
Fbxo30	0.603171	-0.118263
Emb	0.603171	0.332218
Tmem42	0.603171	0.442798
Trmt10c	0.603171	0.22063
Rchy1	0.603858	-0.133147
Sorbs1	0.603885	-0.327584
Zmat4	0.604266	-0.910399
Agps	0.604266	-0.211503
Dag1	0.605564	0.194743
Ppfia2	0.605564	-0.834772
Madcam1	0.605564	0.509531
Mastl	0.605564	-0.371592
Wwp2	0.605564	-0.171828
D10Wsu102e	0.605564	0.28007
Hephl1	0.605564	-1.10736
Trp53inp1	0.605869	-0.623025
Ago3	0.608064	-0.128708
Kif17	0.6091	-0.97582
Kcnt1	0.610657	-0.981747
Mtcl1	0.610657	-0.696245
Hsp90b1	0.611567	0.176444
Cplx1	0.611661	0.959127
Cdkl3	0.612104	-0.235661
Il22ra1	0.612494	0.340519
Phf10	0.612494	-0.205496
Sox9	0.613248	-0.699363
Fam21	0.613296	0.211229
Gm11240	0.614197	0.630825
Smarca5	0.614197	0.181847
Rab37	0.614637	-0.577938
Phlpp1	0.614637	-0.225034
Gtpbp4	0.614637	0.254144
Nfatc2	0.614637	-0.341186
Cecr2	0.614637	1.08613
Casp2	0.615867	-0.333408
4831440E17Rik	0.615867	-0.458893
2410016O06Rik	0.615867	0.276863
4833412C05Rik	0.615867	-1.44821
Efnb2	0.615867	0.196166
P3h4	0.615867	-0.400444
Pdxdc1	0.615867	-0.170645
Errfi1	0.615867	-0.281426
Stard10	0.616402	-0.40312
Fam219b	0.61691	-0.273963
Pfn1	0.618061	0.208475
Sfmbt2	0.618061	-0.764287
Trim59	0.618151	-0.414982
Synpo2	0.618151	-0.520258
Ctage5	0.618286	0.345347
Eif3i	0.619186	0.224639
Trp73	0.620212	1.95338
Pacsin1	0.620212	0.595729
Pdyn	0.620212	-3.0696
Kif21b	0.620212	-0.245892
Sult2b1	0.620212	0.550505
Dennd2d	0.621043	0.14403
Zmym6	0.622163	-0.180445
Ncs1	0.622163	-0.742913
Ddx25	0.622163	1.28149
Zfp213	0.622291	0.279297
Cnot2	0.622291	0.165223
Cdk2ap1	0.622291	-0.289054
Hcn4	0.622291	0.594058
Kctd2	0.622291	0.237806
Fam84a	0.622291	-0.837425
Zfp113	0.623054	-0.221074
Tinf2	0.623146	0.247295
Cds1	0.623146	0.340608
Chst11	0.623146	-0.461276
F7	0.623146	-1.00589
Lrtm2	0.623146	-1.04047
Ric1	0.623146	0.226026
Ccdc85b	0.623146	-0.424562
Aff4	0.623146	-0.191811
Ncbp2	0.623146	-0.308659
Cdk6	0.623146	-0.377076
Vps13b	0.623146	-0.186737
Atn1	0.623146	-0.282101
Atp2b2	0.623146	1.19038
Cacna1h	0.62332	0.325547
Zzef1	0.626672	0.252923
Slc35a4	0.626672	0.137503
Ddr1	0.626672	-0.157968
Ehd3	0.626672	-0.376071
Zfand5	0.626672	-0.188953
Ptp4a2	0.626672	-0.157414
G6pc3	0.626672	0.25088
Tcp11l1	0.626672	-0.395692
Inafm2	0.62728	-0.343359
Ephb2	0.627632	-0.340213
Acvr2a	0.627632	0.228892
Lemd3	0.627842	0.112919
Rbl1	0.627842	0.17868
Osbpl1a	0.627842	0.6476
Cbl	0.627842	-0.263568
Xpo7	0.627842	0.129067
Kcnk2	0.627842	-0.801922
Vav3	0.628005	-0.566162
Hdac2	0.62819	0.213508
Lrp12	0.62819	-1.05272
Bbs1	0.62819	-0.295204
Papss1	0.62819	-0.484992
Ptpmt1	0.62819	0.219972
Impa1	0.62819	0.183956
Rab35	0.62819	-0.174231
Ephb4	0.62819	-0.391518
Eif4g1	0.62819	0.104364
9230112D13Rik	0.62819	0.780098
Kcnq3	0.62819	1.26685
1110032F04Rik	0.628302	0.855467
Fbxo33	0.628302	0.277591
Rpl32	0.628302	0.280418
E030030I06Rik	0.628302	-0.423809
Zfp217	0.628302	-0.261104
Usmg5	0.628302	0.247868
Dok5	0.628302	-1.55174
Xpo1	0.628302	-0.101399
Fam89a	0.628302	1.02033
Parp8	0.628302	-0.263608
Coro1b	0.628302	-0.145057
Clasrp	0.628427	-0.185896
Ano1	0.628427	-0.507209
Mrpl3	0.628427	0.150926
3110002H16Rik	0.628427	-0.158985
Rpl26	0.628427	0.229722
Draxin	0.629423	1.20343
Arf3	0.629683	-0.183964
Bglap3	0.630219	0.427746
Xrcc6bp1	0.630219	0.336648
Veph1	0.63024	-1.47863
Acot11	0.63024	0.416384
Elovl2	0.63045	-0.811475
Tnfrsf12a	0.630583	0.364939
Slc4a8	0.631941	0.454071
Chaf1a	0.63239	0.234656
Tmem91	0.633439	-1.4366
Iba57	0.633439	0.130776
Batf	0.633439	0.496157
1300017J02Rik	0.633439	-1.08639
Ccm2	0.633439	-0.262066
Snx5	0.636036	0.200908
Ube2ql1	0.636036	1.2155
Stim2	0.636741	-0.304552
Bloc1s6	0.636741	0.227901
Micall2	0.638534	0.239403
Neurog3	0.638534	0.543872
Pcyt2	0.638534	0.424168
Kras	0.639155	-0.16199
Rnf185	0.639476	0.250445
Rara	0.641128	0.16503
Wdr78	0.641128	-0.315798
Ube2j1	0.641128	0.16899
Cs	0.641128	0.381083
Adgrb3	0.64136	0.74431
Calm2	0.64136	0.152905
Rgs10	0.641547	-0.291195
Pibf1	0.642162	-0.252009
Capn7	0.642701	-0.0983252
Rilp	0.642767	0.260385
Ptpdc1	0.642767	-0.424514
Siah1a	0.642767	0.150407
Grm8	0.642767	-1.10892
Tmem127	0.642767	-0.123919
Cep83	0.644024	-0.200757
Rai1	0.644161	-0.230404
Keap1	0.644161	0.212571
Tm6sf1	0.644161	-0.303928
Dscam	0.644462	1.34018
Tpk1	0.645758	0.146608
Slit2	0.645822	0.46416
Atp13a3	0.645822	-0.434196
Rpia	0.645875	0.175642
Zfp938	0.647479	-0.17983
Ppp3ca	0.648793	-0.103341
Morc2a	0.648793	-0.185988
Etv6	0.649302	-0.202041
Ubr5	0.649894	-0.104385
Polr2m	0.651232	-0.195047
Serp1	0.652121	0.180764
Ctnnb1	0.653061	-0.163354
Rrm2b	0.653061	0.145788
Thbs4	0.653061	-1.85674
Ap5b1	0.655096	0.297769
Dyrk1a	0.656133	0.153274
Spen	0.657152	-0.15197
Strn3	0.657152	-0.171907
Crkl	0.657152	0.138626
Scly	0.657152	0.384554
Unc45a	0.657152	-0.14038
Dscr3	0.658958	-0.119103
Ap1b1	0.658974	0.186081
Gsg2	0.658974	0.211119
2810468N07Rik	0.659615	0.827885
G2e3	0.659615	-0.165371
Nop56	0.659854	0.347605
Lypd6	0.659854	-0.662698
Tdrd5	0.660002	-0.873729
Kitl	0.660002	0.157096
Sp3	0.660307	-0.115142
AW011738	0.661378	0.521448
[truncated: 1,506 more rows]
