# Supplementary material for: Braf mutation induces rapid neoplastic transformation in the aged and aberrantly methylated intestinal epithelium
Source: HighWire-hosted journal article supplement (doi:10.1136/gutjnl-2020-322166), 2021-07-06
Supplement: gutjnl-2020-322166supp012_data_supplement.xlsx [file gutjnl-2020-322166supp012_data_supplement.xlsx]

## Sheet: Supplemetary_CIMP
Supplementary Table S3: Temporal DNA methylation changes in CpGs found in the proximal promoter regions of genes that comprise the Human CIMP panel. The DNA methylation % of each CpG was regressed against age in both wild type and Braf mutant samples.
Gene Name	Position	Distance to TSS	Wild Type					Braf Mutant					Δ Slope (Braf mutant - Wild Type)
			PValue	FDR.PValue	RSquare	Intercept	Slope (%/Day)	PValue	FDR.PValue	RSquare	Intercept	Slope (%/Day)
Cacna1g	chr11.94474175	22	0.908845	0.976891	0.000582314	0.826021	-0.000223388	0.530027	0.773166	0.0113637	0.848966	0.00184088	0.00206427
Cacna1g	chr11.94474180	17	0.964225	0.989717	8.93843e-05	0.63315	-8.0346e-05	0.0102409	0.0582332	0.173887	-0.503728	0.00626851	0.00634885
Cacna1g	chr11.94474182	15	NA	NA	NA	NA	NA	0.0260554	0.123119	0.133685	-0.169527	0.00147487	NA
Cacna1g	chr11.94474185	12	NA	NA	NA	NA	NA	0.0726332	0.260589	0.0891573	0.0312022	0.0028391	NA
Cacna1g	chr11.94474198	-1	0.455576	0.808228	0.0244334	0.712869	-0.000918595	0.621107	0.824666	0.00705576	0.929093	-0.00112101	-0.00020241
Cacna1g	chr11.94474230	-33	0.476123	0.8167	0.0223068	0.877839	-0.00125418	0.214166	0.513514	0.0437335	0.697902	-0.0017789	-0.000524726
Cacna1g	chr11.94474234	-37	0.577054	0.862899	0.0137244	0.274399	-0.000351422	NA	NA	NA	NA	NA	NA
Cacna1g	chr11.94474235	-38	0.791601	0.955284	0.00309748	0.846048	-0.000621509	0.46723	0.732082	0.0152008	0.706628	-0.00144057	-0.000819058
Cacna1g	chr11.94474246	-49	0.77032	0.954372	0.00378024	0.533364	-0.000475183	0.496553	0.755268	0.0133089	0.322573	0.00145039	0.00192557
Cacna1g	chr11.94474247	-50	0.635786	0.894275	0.00991656	0.365661	0.000936656	0.625617	0.827342	0.00687553	1.00818	-0.00116941	-0.00210607
Cacna1g	chr11.94474255	-58	0.84302	0.966944	0.00174101	1.9196	-0.000633162	0.0813791	0.28239	0.0842524	1.22377	-0.00400436	-0.00337119
Cacna1g	chr11.94474256	-59	0.480746	0.818783	0.0218479	0.0974365	0.00231088	0.881239	0.965358	0.000646683	0.529106	0.000396944	-0.00191394
Cacna1g	chr11.94474261	-64	0.489453	0.822518	0.0210026	0.0751268	0.000811204	0.799836	0.923293	0.00186162	0.517658	-0.000465507	-0.00127671
Cacna1g	chr11.94474262	-65	0.552097	0.848792	0.0155873	0.137184	0.0011329	0.403379	0.692905	0.0200325	0.318892	0.0013922	0.000259301
Cacna1g	chr11.94474264	-67	0.244006	0.645211	0.0585207	0.772143	-0.00134174	0.969244	0.987207	4.30837e-05	0.657146	-9.45052e-05	0.00124723
Cacna1g	chr11.94474265	-68	NA	NA	NA	NA	NA	0.19222	0.483918	0.0480877	-0.039781	0.00122058	NA
Cacna1g	chr11.94474267	-70	0.468624	0.8167	0.0230661	0.620945	-0.000755361	0.648694	0.841016	0.00599722	0.454794	-0.000586346	0.000169015
Cacna1g	chr11.94474268	-71	NA	NA	NA	NA	NA	0.150659	0.421188	0.0581045	0.00874275	0.00148632	NA
Cacna1g	chr11.94474276	-79	0.140444	0.505902	0.092027	-0.0450543	0.000261424	0.959056	0.983636	7.63853e-05	0.115555	-4.23057e-05	-0.000303729
Cacna1g	chr11.94474277	-80	0.813516	0.955284	0.00246944	0.238983	-0.000212258	0.458678	0.725237	0.0157885	0.141561	-0.000400148	-0.00018789
Cacna1g	chr11.94474282	-85	0.505254	0.822518	0.0195294	0.432039	-0.000722575	0.255512	0.5591	0.0367767	0.115807	0.00192785	0.00265043
Cacna1g	chr11.94474283	-86	NA	NA	NA	NA	NA	0.305235	0.604591	0.0300054	-0.0459326	0.0016248	NA
Cacna1g	chr11.94474292	-95	0.838819	0.965333	0.00183666	0.574153	-0.000287297	0.469217	0.733683	0.0150667	0.745603	-0.00166391	-0.00137661
Cacna1g	chr11.94474295	-98	0.901691	0.974452	0.00067776	0.160797	0.000127879	0.79916	0.922945	0.00187447	0.165138	0.000230567	0.000102688
Cacna1g	chr11.94474364	-167	0.0163634	0.142966	0.225832	-0.324279	0.00228246	NA	NA	NA	NA	NA	NA
Cacna1g	chr11.94474367	-170	0.901691	0.974452	0.00067776	0.0893318	7.1044e-05	0.458678	0.725237	0.0157885	0.105477	-0.00029815	-0.000369194
Cacna1g	chr11.94474368	-171	0.504581	0.822518	0.0195906	0.592978	-0.000650256	0.485636	0.74681	0.0139916	0.0828991	0.000557301	0.00120756
Cacna1g	chr11.94474407	-210	NA	NA	NA	NA	NA	0.0600101	0.227103	0.0974231	-0.141039	0.00253365	NA
Cacna1g	chr11.94474408	-211	0.232184	0.629807	0.0614491	-0.0777316	0.000970485	0.358328	0.654032	0.0241565	0.104348	0.00100904	3.85553e-05
Cacna1g	chr11.94474413	-216	0.120477	0.480562	0.101576	-0.0982191	0.000549304	0.907691	0.977105	0.000389583	0.342108	0.000189957	-0.000359347
Cacna1g	chr11.94474414	-217	0.405897	0.784497	0.030226	0.569758	-0.000762046	0.458678	0.725237	0.0157885	0.0618311	-0.000174777	0.000587269
Cacna1g	chr11.94474443	-246	0.813516	0.955284	0.00246944	0.148557	-0.000131944	0.330778	0.629088	0.0270399	0.150784	0.00147564	0.00160758
Cacna1g	chr11.94474444	-247	0.446831	0.802257	0.0253838	0.0175481	0.000394637	0.680831	0.858869	0.00489156	0.105455	0.000278571	-0.000116066
Cacna1g	chr11.94474446	-249	0.809744	0.955284	0.0025722	0.172732	-0.000155702	0.167685	0.450272	0.053671	0.744971	-0.00215111	-0.0019954
Cacna1g	chr11.94474447	-250	0.703871	0.927016	0.00639893	0.465522	-0.000353812	0.265573	0.562772	0.0352838	0.176421	-0.000598189	-0.000244377
Cacna1g	chr11.94474450	-253	0.888222	0.974452	0.000877425	0.239876	0.000147275	0.398474	0.688826	0.0204498	0.890757	-0.00218239	-0.00232966
Cacna1g	chr11.94474451	-254	0.321329	0.710382	0.0427571	0.0302232	0.00182927	0.287798	0.587037	0.0322155	0.173481	-0.000490378	-0.00231965
Cacna1g	chr11.94474456	-259	0.65768	0.905412	0.0086866	4.32558	-0.00217169	0.695457	0.866875	0.00443144	2.08048	0.0014317	0.0036034
Cacna1g	chr11.94474457	-260	0.879159	0.974452	0.00102654	0.687515	-0.000210301	0.440676	0.72417	0.0170827	0.528157	-0.000813528	-0.000603227
Cacna1g	chr11.94474467	-270	0.415678	0.789583	0.0290067	0.799382	-0.000980576	0.546627	0.782799	0.0104767	0.295336	-0.00053369	0.000446886
Cacna1g	chr11.94474468	-271	0.282591	0.674578	0.0500039	1.16704	-0.00180488	0.903461	0.975249	0.000426282	0.228035	-0.000115243	0.00168963
Cacna1g	chr11.94474486	-289	0.477309	0.8167	0.0221884	0.394703	-0.000680639	0.0702412	0.254597	0.0906048	0.275092	0.00421564	0.00489628
Cacna1g	chr11.94474487	-290	0.776626	0.955284	0.0035703	0.722711	0.000503357	0.687741	0.862609	0.00467091	0.412889	-0.000553636	-0.00105699
Cacna1g	chr11.94474490	-293	0.198016	0.583583	0.0709697	-0.105724	0.000982557	0.979603	0.991139	1.89434e-05	0.309142	-3.35827e-05	-0.00101614
Cacna1g	chr11.94474499	-302	0.393011	0.773916	0.0318972	0.64145	-0.000826031	0.755072	0.89952	0.00281655	0.0867425	0.000206538	0.00103257
Cacna1g	chr11.94474500	-303	0.554397	0.850091	0.0154091	0.288843	-0.000383006	0.940517	0.983101	0.000161368	0.305001	0.000130097	0.000513103
Cacna1g	chr11.94474537	-340	0.179995	0.555949	0.0767587	-0.0251036	0.00130185	0.123625	0.37227	0.0663983	0.0965397	0.00288133	0.00157948
Cacna1g	chr11.94474852	-655	0.000208975	0.00440904	0.456765	15.582	-0.0237688	0.038823	0.164061	0.116352	12.8331	-0.0174233	0.0063455
Neurog1	chr13.56252092	70	0.00664764	0.0718603	0.278981	0.461949	0.00777405	1.27479e-05	0.000149655	0.424024	-0.146767	0.0252565	0.0174824
Neurog1	chr13.56252093	69	0.372207	0.756191	0.0347608	2.21074	0.00368982	5.2731e-05	0.000547464	0.377191	0.100525	0.0213397	0.0176499
Neurog1	chr13.56252097	65	0.613734	0.882823	0.0112564	2.8579	-0.00138869	3.53372e-07	5.50559e-06	0.528078	-0.0833584	0.0254522	0.0268409
Neurog1	chr13.56252098	64	0.0384151	0.255546	0.173371	0.0382452	0.00765892	0.00152655	0.0113128	0.252532	0.211857	0.0144505	0.00679161
Neurog1	chr13.56252112	50	0.0621458	0.348837	0.143197	0.439307	0.0044807	1.44221e-06	2.01649e-05	0.489585	0.178696	0.0289049	0.0244242
Neurog1	chr13.56252113	49	0.138798	0.505902	0.0927585	1.06642	0.00554799	7.00032e-05	0.00070882	0.367441	-0.456751	0.0261452	0.0205972
Neurog1	chr13.56252115	47	0.0638274	0.354921	0.141516	1.54855	0.00835805	0.00105618	0.00818922	0.267111	0.869723	0.0199218	0.0115638
Neurog1	chr13.56252118	44	0.046443	0.288779	0.161501	1.38126	0.0105476	3.19887e-05	0.000346868	0.39406	1.60662	0.0330776	0.02253
Socs1	chr16.10785435	100	0.22846	0.624868	0.0624072	0.772118	-0.00143132	0.553127	0.782799	0.0101425	0.0135954	0.000297251	0.00172857
Socs1	chr16.10785436	99	0.193636	0.577376	0.0723216	0.549915	-0.000889661	0.350872	0.647653	0.0249073	0.118358	0.000876693	0.00176635
Socs1	chr16.10785443	92	0.287032	0.674578	0.0491132	0.381226	-0.000777559	0.703985	0.871504	0.00417514	0.442388	0.000778337	0.0015559
Socs1	chr16.10785444	91	0.558034	0.852265	0.01513	0.368457	0.00130695	0.872345	0.960905	0.000747993	0.345339	0.000250211	-0.00105674
Socs1	chr16.10785445	90	0.521384	0.831512	0.0181026	0.504916	-0.00067919	0.48179	0.743793	0.0142382	0.565419	0.00156464	0.00224383
Socs1	chr16.10785446	89	0.813516	0.955284	0.00246944	0.343538	-0.000305121	0.251765	0.554339	0.0373508	0.57511	-0.00116877	-0.000863646
Socs1	chr16.10785453	82	0.199379	0.585338	0.0705557	1.13423	-0.00180786	0.225547	0.52828	0.0416719	0.0172799	0.00159237	0.00340022
Socs1	chr16.10785454	81	0.591542	0.870957	0.0127125	0.154349	0.000455554	0.824559	0.936196	0.00142331	0.538829	-0.000285872	-0.000741426
Socs1	chr16.10785455	80	0.536639	0.840082	0.0168213	0.615697	-0.000721121	0.0290563	0.134137	0.128951	-0.182321	0.00205396	0.00277508
Socs1	chr16.10785456	79	0.26332	0.668146	0.0540733	1.02832	-0.00152404	0.634181	0.832487	0.00654107	0.559461	-0.000700797	0.000823248
Socs1	chr16.10785469	66	0.800696	0.955284	0.00282769	0.217727	0.000203693	0.192955	0.484851	0.047933	0.384265	-0.0010862	-0.00128989
Socs1	chr16.10785491	44	0.0758666	0.390921	0.13063	-0.351772	0.00294231	0.314204	0.613804	0.0289292	0.0916511	0.00101098	-0.00193133
Socs1	chr16.10785504	31	0.291708	0.679533	0.0481931	0.946655	-0.00158541	0.225808	0.52861	0.041626	0.194736	0.002093	0.00367841
Socs1	chr16.10785509	26	0.965061	0.98996	8.52552e-05	0.340102	-5.2022e-05	0.710298	0.875027	0.00399098	0.900677	-0.000725597	-0.000673575
Socs1	chr16.10785517	18	0.484577	0.820904	0.021473	0.340239	-0.000486138	0.0953624	0.314873	0.0774421	-0.078803	0.00124083	0.00172697
Socs1	chr16.10785521	14	0.911666	0.977857	0.000546699	0.232716	-8.2877e-05	0.731348	0.88657	0.00341055	0.35235	-0.000412768	-0.000329891
Socs1	chr16.10785543	-8	0.505254	0.822518	0.0195294	0.586339	-0.000980638	0.661438	0.848114	0.00554286	0.359464	-0.000453182	0.000527456
Socs1	chr16.10785544	-9	0.272898	0.674578	0.0520079	0.610977	-0.000970792	0.313034	0.612578	0.0290674	0.00866888	0.00081441	0.0017852
Socs1	chr16.10785578	-43	0.140444	0.505902	0.092027	-0.201419	0.00116872	0.6343	0.832555	0.00653649	0.223266	-0.000390281	-0.001559
Socs1	chr16.10785579	-44	0.477309	0.8167	0.0221884	0.132596	-0.000228652	0.838035	0.943319	0.00121023	0.119387	0.000161524	0.000390176
Socs1	chr16.10785602	-67	0.192309	0.575365	0.072738	0.0182829	0.00136562	0.824477	0.936175	0.00142465	0.306993	0.000251628	-0.00111399
Socs1	chr16.10785608	-73	0.19901	0.584876	0.0706675	0.789827	-0.00152724	0.878183	0.963832	0.000680641	0.227746	0.000145257	0.00167249
Socs1	chr16.10785620	-85	0.476853	0.8167	0.0222338	0.140955	0.000766605	0.11438	0.35455	0.0696893	-0.00426328	0.00185424	0.00108763
Socs1	chr16.10785621	-86	0.481162	0.818983	0.021807	0.256141	0.00107554	0.684174	0.860638	0.00478406	0.196533	0.000400201	-0.00067534
Socs1	chr16.10785632	-97	0.162494	0.525369	0.0830202	0.31694	-0.000707659	0.0259852	0.123119	0.133802	-0.136397	0.00350532	0.00421298
Socs1	chr16.10785669	-134	NA	NA	NA	NA	NA	0.553127	0.782799	0.0101425	0.0139352	0.000304682	NA
Socs1	chr16.10785670	-135	0.33881	0.726771	0.0398354	0.882625	-0.00125211	0.157374	0.432889	0.0562934	0.0422205	0.00196695	0.00321906
Socs1	chr16.10785689	-154	0.0271935	0.202644	0.194814	0.821576	-0.00173858	0.642721	0.83747	0.00621759	0.240757	0.000496314	0.0022349
Socs1	chr16.10785690	-155	0.373417	0.757222	0.0345883	1.03231	-0.00124455	0.304624	0.603957	0.0300801	0.396048	-0.000896084	0.00034847
Socs1	chr16.10785694	-159	0.296413	0.684779	0.0472853	0.728512	-0.00103218	0.266715	0.564161	0.0351187	0.448146	-0.00106638	-3.4199e-05
Socs1	chr16.10785695	-160	0.580958	0.865066	0.0134468	0.353965	-0.000382496	0.680633	0.858762	0.00489798	0.259342	-0.000311043	7.1453e-05
Socs1	chr16.10785727	-192	0.0799895	0.403091	0.127297	0.777166	-0.00141632	0.17079	0.455443	0.052916	-0.00462996	0.00106411	0.00248043
Socs1	chr16.10785736	-201	0.754478	0.947474	0.00433641	0.467956	0.000433259	0.23075	0.53499	0.0407691	0.576334	-0.00123462	-0.00166788
Socs1	chr16.10785751	-216	0.73846	0.940921	0.00494136	0.37689	-0.000247947	0.0483575	0.193601	0.1068	-0.117007	0.00201424	0.00226218
Socs1	chr16.10785780	-245	0.901691	0.974452	0.00067776	0.247381	0.000196737	0.458678	0.725237	0.0157885	0.107586	-0.000304113	-0.00050085
Socs1	chr16.10785781	-246	0.429997	0.789583	0.0272938	-0.0295616	0.000491825	0.0854916	0.292338	0.0821308	0.516186	-0.00165075	-0.00214258
Socs1	chr16.10785799	-264	0.179024	0.554288	0.0770886	-0.151	0.00146654	0.485988	0.747086	0.0139692	0.382263	-0.000681768	-0.00214831
Socs1	chr16.10785800	-265	0.429997	0.789583	0.0272938	-0.0375205	0.000624239	0.928885	0.979105	0.00023082	0.14423	-6.53762e-05	-0.000689615
Socs1	chr16.10785809	-274	0.315576	0.705226	0.043763	0.860039	-0.00153889	0.197792	0.491346	0.0469308	0.664404	-0.00150181	3.7075e-05
Socs1	chr16.10785810	-275	0.900673	0.974452	0.000691941	0.632305	-0.000156082	0.835949	0.942172	0.00124202	0.380302	0.000268332	0.000424414
Socs1	chr16.10785816	-281	0.871778	0.974452	0.00115683	0.376015	-0.000198231	0.126926	0.378492	0.0652863	0.457038	-0.00138999	-0.00119176
Socs1	chr16.10785817	-282	0.287032	0.674578	0.0491132	0.197673	-0.000403179	0.514129	0.76547	0.0122606	0.0992427	-0.000262735	0.000140444
Socs1	chr16.10785819	-284	0.272663	0.674578	0.0520575	0.536477	-0.00085406	0.475441	0.738707	0.0146522	0.273275	-0.000643037	0.000211023
Socs1	chr16.10785820	-285	0.287032	0.674578	0.0491132	0.395345	-0.000806357	0.520912	0.766888	0.0118721	0.218555	0.000727341	0.0015337
Socs1	chr16.10785835	-300	NA	NA	NA	NA	NA	0.722087	0.881578	0.00365962	0.280768	-0.000302551	NA
Socs1	chr16.10785837	-302	0.218212	0.611002	0.0651384	0.022509	0.00132862	0.783631	0.914643	0.00218289	0.354244	-0.000395724	-0.00172435
Socs1	chr16.10785848	-313	0.723665	0.935952	0.00553909	0.519202	-0.000355871	0.580352	0.800215	0.00881976	0.111317	0.000450367	0.000806238
Socs1	chr16.10785861	-326	0.443634	0.799773	0.0257382	0.85858	-0.000874874	0.233728	0.538827	0.040263	0.148433	0.00190513	0.00278001
Socs1	chr16.10785862	-327	0.138391	0.505902	0.0929407	-0.00502941	0.00273966	0.835031	0.941652	0.00125617	0.253145	0.000193922	-0.00254573
Socs1	chr16.10785891	-356	0.364745	0.749749	0.0358412	0.454101	-0.000735679	0.860019	0.954638	0.000900921	0.440518	-0.000348414	0.000387265
Socs1	chr16.10785896	-361	0.421354	0.789583	0.0283176	-0.0305141	0.000472338	0.959056	0.983636	7.63853e-05	0.111111	-4.06785e-05	-0.000513016
Socs1	chr16.10785958	-423	0.746468	0.944061	0.0046335	0.384997	-0.000245924	0.0694564	0.252646	0.0910907	-0.110924	0.00190558	0.0021515
Socs1	chr16.10785976	-441	0.328615	0.717474	0.0415153	0.0312461	0.000763215	0.657107	0.845698	0.00569489	0.156054	0.000485874	-0.000277341
Socs1	chr16.10785993	-458	0.813516	0.955284	0.00246944	0.101789	-9.0406e-05	0.628992	0.829403	0.0067425	0.381033	0.000694026	0.000784432
Socs1	chr16.10786102	-567	0.809744	0.955284	0.0025722	0.325143	-0.000293086	0.0158905	0.0834373	0.155066	-0.252458	0.00266448	0.00295757
Socs1	chr16.10786114	-579	0.901691	0.974452	0.00067776	0.189173	0.000150446	NA	NA	NA	NA	NA	NA
Socs1	chr16.10786141	-606	0.809744	0.955284	0.0025722	0.162571	-0.000146543	0.30149	0.600544	0.0304665	0.508999	-0.00133183	-0.00118529
Socs1	chr16.10786146	-611	0.477309	0.8167	0.0221884	0.265191	-0.000457304	0.458678	0.725237	0.0157885	0.105477	-0.00029815	0.000159154
Socs1	chr16.10786155	-620	0.171648	0.5414	0.0796588	-0.0854822	0.00147579	0.953235	0.983636	9.96726e-05	0.0694136	-2.87655e-05	-0.00150456
Socs1	chr16.10786161	-626	0.194704	0.579043	0.071989	-0.0644631	0.00143318	0.15095	0.421694	0.0580241	-0.0315211	0.00225941	0.000826232
Socs1	chr16.10786167	-632	0.813516	0.955284	0.00246944	0.392615	-0.000348709	0.532165	0.774581	0.0112467	0.820779	-0.00137082	-0.00102212
Socs1	chr16.10786191	-656	0.822722	0.959114	0.00222789	0.296296	-0.000198385	0.197797	0.491353	0.0469296	1.12661	-0.00331176	-0.00311338
Socs1	chr16.10786244	-709	NA	NA	NA	NA	NA	0.5509	0.782799	0.0102562	0.534373	-0.000979884	NA
Socs1	chr16.10786254	-719	0.648763	0.900832	0.00917579	0.0898334	0.000331742	0.366812	0.661565	0.0233273	0.393277	-0.00111167	-0.00144341
Igf2	chr7.142657408	87	0.186053	0.566087	0.0747444	44.3679	-0.0125402	0.174395	0.459602	0.0520581	37.5635	-0.0171718	-0.00463153
Igf2	chr7.142658379	424	0.655208	0.904156	0.00882061	2.47951	-0.00145242	0.000182901	0.00169575	0.333376	0.375402	0.0177575	0.01921
Igf2	chr7.142658385	418	0.177391	0.551545	0.0776477	1.07638	0.00656345	0.0620552	0.23275	0.09597	2.35632	0.0101858	0.00362238
Igf2	chr7.142658402	401	0.36997	0.754354	0.0350815	0.427631	0.00141919	2.49964e-06	3.34793e-05	0.473736	-0.380232	0.0157759	0.0143567
Igf2	chr7.142658415	388	0.470966	0.8167	0.0228269	2.82681	0.00346891	2.82308e-08	5.30843e-07	0.590347	0.177586	0.033807	0.0303381
Igf2	chr7.142658422	381	0.0558215	0.325296	0.149951	1.22125	0.00911766	1.66933e-10	4.61563e-09	0.69315	-0.934255	0.0336861	0.0245685
Igf2	chr7.142658426	377	0.333319	0.721854	0.0407321	6.54907	0.00690354	2.74295e-05	0.000301458	0.399165	4.06722	0.0402166	0.0333131
Igf2	chr7.142658441	362	0.0571579	0.330358	0.148463	0.861248	0.00486254	0.00138695	0.0104022	0.256349	0.491704	0.0177843	0.0129218
Igf2	chr7.142659053	-250	0.831458	0.962459	0.00201069	0.698253	0.00042138	0.0102433	0.0582449	0.173876	-0.0225736	0.00449893	0.00407755
Igf2	chr7.142659077	-274	0.0487692	0.298099	0.158436	-0.245514	0.00196176	0.139423	0.401444	0.0613402	0.133869	0.00273045	0.000768689
Igf2	chr7.142659082	-279	0.0254698	0.194201	0.198849	-0.165714	0.00225544	0.000144719	0.00137159	0.341827	-0.796049	0.0102077	0.00795223
Igf2	chr7.142659085	-282	0.877533	0.974452	0.00105456	0.895637	0.000270995	0.00109846	0.00847849	0.265568	-0.0619015	0.00734675	0.00707576
Igf2	chr7.142659098	-295	0.459299	0.81064	0.0240372	0.0518382	0.00106811	0.0163922	0.085578	0.153728	0.135265	0.00429992	0.00323182
Igf2	chr7.142659109	-306	0.00523453	0.0596318	0.292634	0.361664	0.00514184	4.83096e-06	6.12944e-05	0.454136	-1.45032	0.0298372	0.0246954
Igf2	chr7.142659194	-391	0.742451	0.942453	0.00478656	1.79946	0.000638248	0.000899846	0.00710511	0.273381	0.606939	0.0202274	0.0195892
Igf2	chr7.142659205	-402	0.0185515	0.156763	0.218231	-0.055268	0.00507017	0.0165366	0.0861986	0.15335	1.12743	0.0138406	0.00877041
Igf2	chr7.142659215	-412	0.00630459	0.068941	0.282025	-0.378749	0.00351114	0.00193801	0.0139275	0.242969	-0.000776716	0.00874714	0.005236
Igf2	chr7.142659227	-424	0.307909	0.697264	0.0451396	0.0325449	0.000871486	0.00215265	0.0152653	0.238731	-0.35328	0.0053672	0.00449572
