# Supplementary material for: Braf mutation induces rapid neoplastic transformation in the aged and aberrantly methylated intestinal epithelium
Source: HighWire-hosted journal article supplement (doi:10.1136/gutjnl-2020-322166), 2021-07-06
Supplement: gutjnl-2020-322166supp013_data_supplement.xlsx [file gutjnl-2020-322166supp013_data_supplement.xlsx]

## Sheet: Sheet1
Supplementary Table S5: Regression results for Type-A CpGs depicted in Figure 1C (Cdkn2a) and 1D (Dkk3)
CpG Location	PValue	FDR PValue	RSquare	Intercept	Slope	Distance to TSS	Gene Name
chr4.89294349	5.2471e-09	7.43686e-07	0.779279	5.42026	0.0640005	270	Cdkn2a
chr7.112159127	5.54717e-08	5.02421e-06	0.729738	21.7333	0.0499298	-70	Dkk3
chr4.89294308	7.70572e-08	6.58358e-06	0.722018	1.98744	0.0423718	311	Cdkn2a
chr4.89294317	8.83199e-08	7.35342e-06	0.71875	7.01561	0.063795	302	Cdkn2a
chr7.112159103	2.62515e-07	1.79395e-05	0.691274	8.51399	0.0477577	-46	Dkk3
chr4.89294318	3.22357e-07	2.11918e-05	0.685809	6.62324	0.067788	301	Cdkn2a
chr7.112159102	4.39722e-07	2.73501e-05	0.677366	9.38936	0.0453028	-45	Dkk3
chr4.89294353	5.17321e-07	3.12732e-05	0.672858	0.746814	0.0369954	266	Cdkn2a
chr4.89294397	2.46744e-06	0.000112805	0.626291	-1.13389	0.0352563	222	Cdkn2a
chr4.89294398	4.4371e-06	0.000182907	0.607194	-1.70238	0.0324539	221	Cdkn2a
chr4.89294288	4.5015e-06	0.000185005	0.606714	2.87409	0.0330424	331	Cdkn2a
chr7.112159075	5.0759e-06	0.00020442	0.602687	8.97773	0.0329991	-18	Dkk3
chr4.89294297	6.57055e-06	0.000253623	0.593897	-0.424828	0.0282858	322	Cdkn2a
chr4.89294348	8.20149e-06	0.000304356	0.586198	7.98989	0.058083	271	Cdkn2a
chr7.112159121	9.9544e-06	0.000357821	0.579358	9.48957	0.0494535	-64	Dkk3
chr4.89294433	1.28238e-05	0.000440597	0.57025	-0.166247	0.0185731	186	Cdkn2a
chr7.112159074	1.34591e-05	0.000458409	0.56849	8.98726	0.0365162	-17	Dkk3
chr7.112159057	1.36422e-05	0.000463324	0.567997	4.27813	0.032616	0	Dkk3
chr4.89294354	1.81053e-05	0.000584962	0.557545	3.99644	0.0312678	265	Cdkn2a
chr7.112159014	4.39354e-05	0.00121701	0.523236	0.863157	0.030223	43	Dkk3
chr4.89294289	6.36821e-05	0.00165667	0.508139	5.23735	0.0352321	330	Cdkn2a
chr4.89294287	6.42387e-05	0.00166847	0.50778	-0.627303	0.0209679	332	Cdkn2a
chr4.89294416	0.000100275	0.00241111	0.489067	-0.229535	0.00858942	203	Cdkn2a
chr4.89294240	0.000136606	0.00310916	0.475688	-0.0261679	0.0226152	379	Cdkn2a
chr4.89294271	0.000168056	0.00368768	0.466542	6.94352	0.0275466	348	Cdkn2a
chr7.112159131	0.000246492	0.00504755	0.449248	5.82572	0.0356131	-74	Dkk3
chr4.89294410	0.000585249	0.010219	0.408326	0.237642	0.0143113	209	Cdkn2a
chr4.89294307	0.000655935	0.0112211	0.402732	4.00067	0.0233783	312	Cdkn2a
chr4.89294698	0.000657748	0.0112475	0.402596	-0.486106	0.00810222	-79	Cdkn2a
chr4.89294286	0.000707451	0.0119468	0.398997	1.61438	0.0146024	333	Cdkn2a
chr4.89294263	0.000932397	0.0149622	0.385183	-1.11581	0.013002	356	Cdkn2a
chr4.89294270	0.00196045	0.0273621	0.346632	6.14114	0.0200198	349	Cdkn2a
chr4.89294247	0.00384747	0.0468258	0.30993	1.04264	0.0115651	372	Cdkn2a
