# Supplementary figures and images for: Braf mutation induces rapid neoplastic transformation in the aged and aberrantly methylated intestinal epithelium
Source: HighWire-hosted journal article supplement (doi:10.1136/gutjnl-2020-322166), 2021-07-06

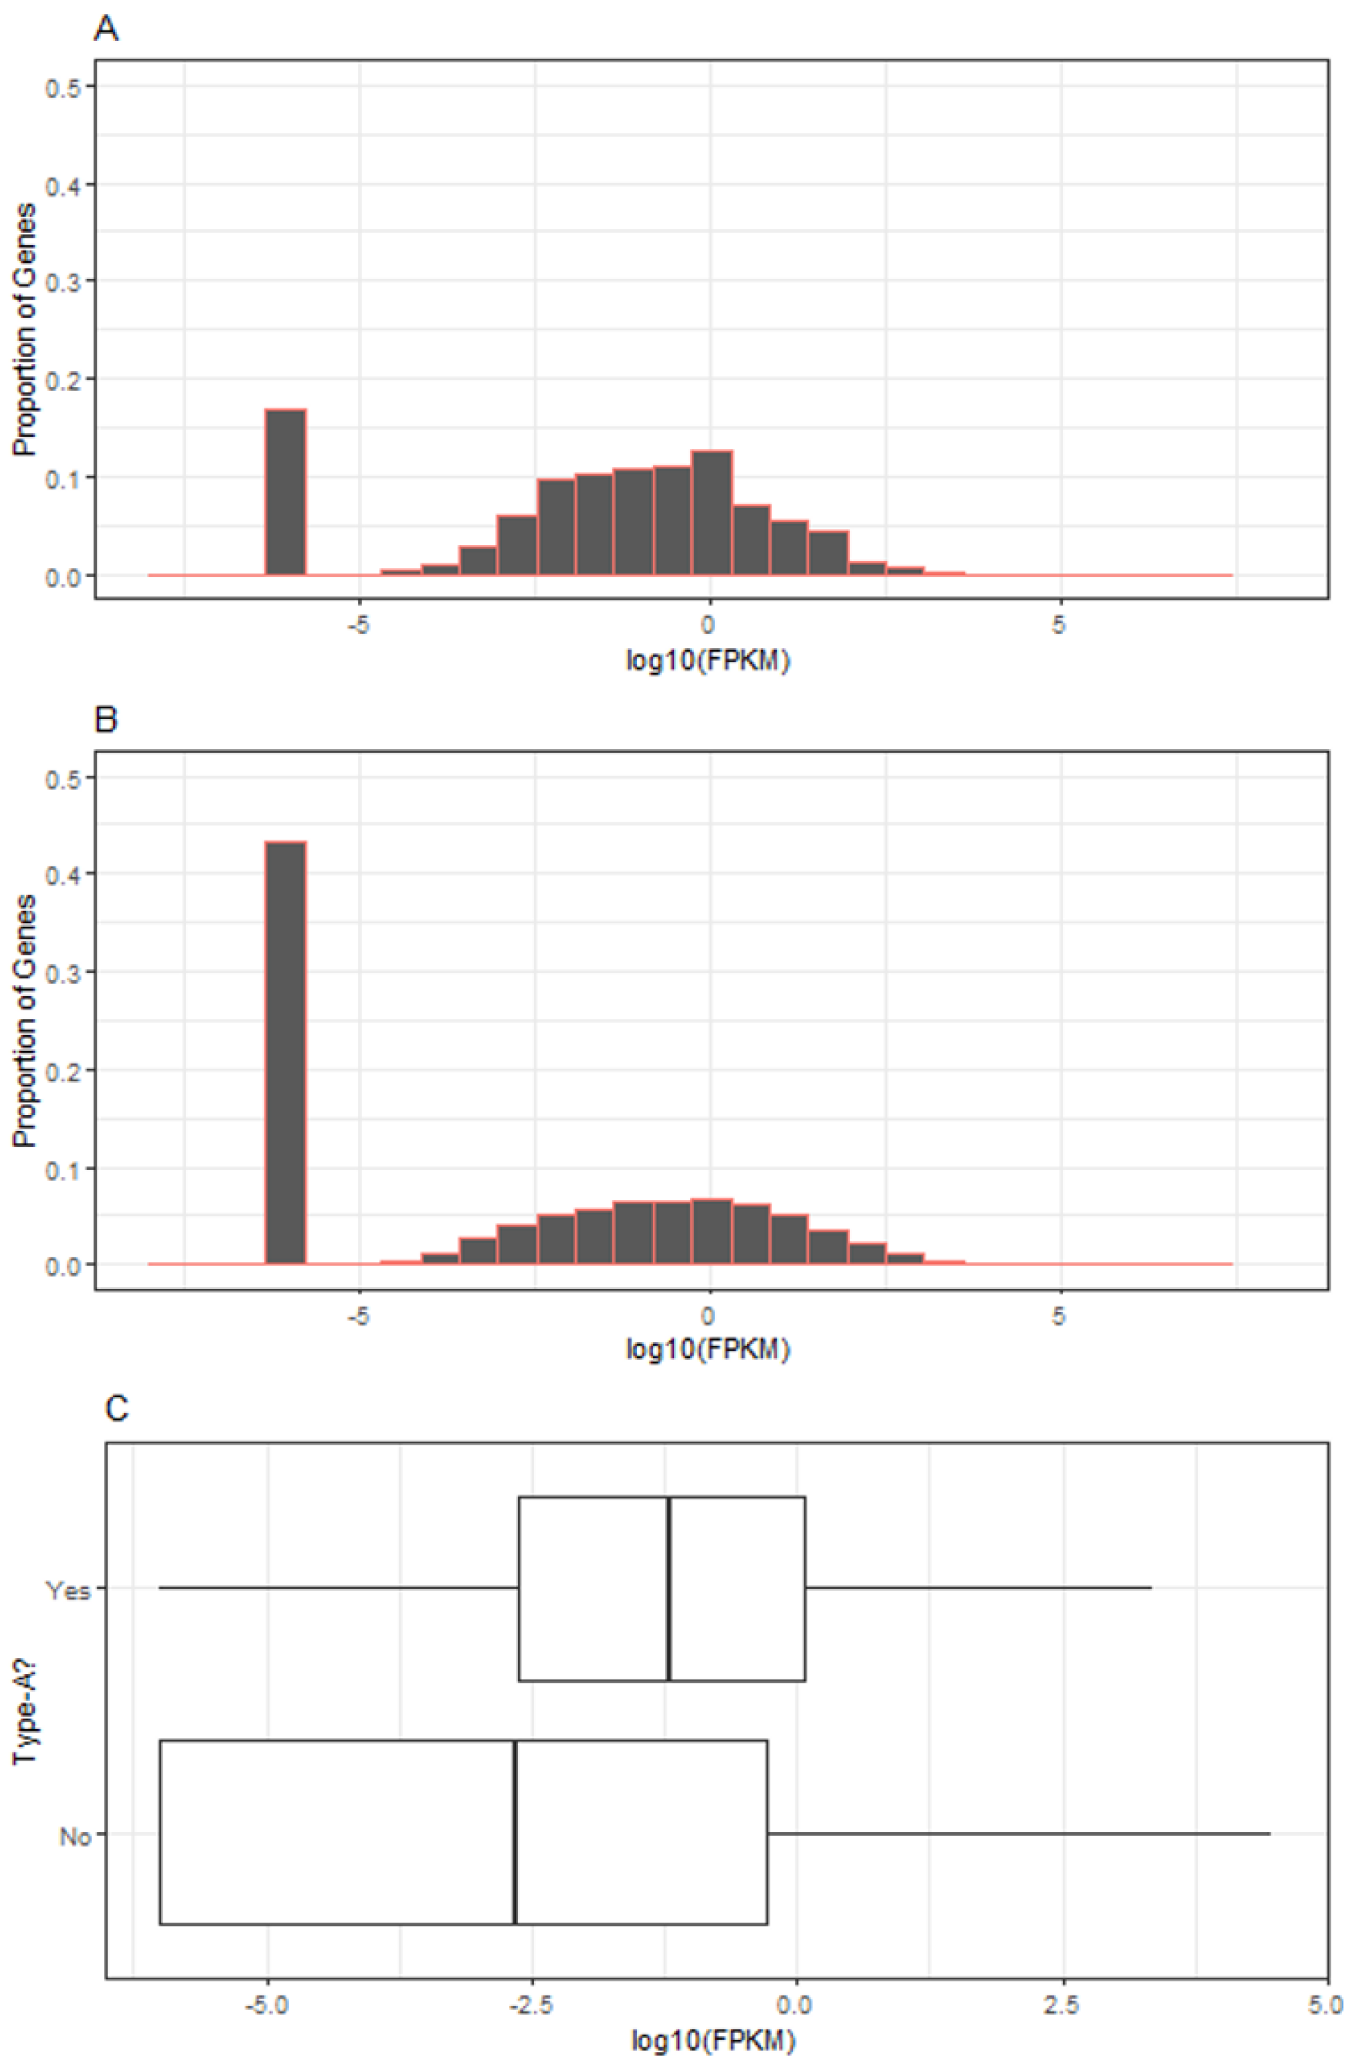

Supplement: gutjnl-2020-322166supp002_data_supplement.pdf [file gutjnl-2020-322166supp002_data_supplement.pdf]

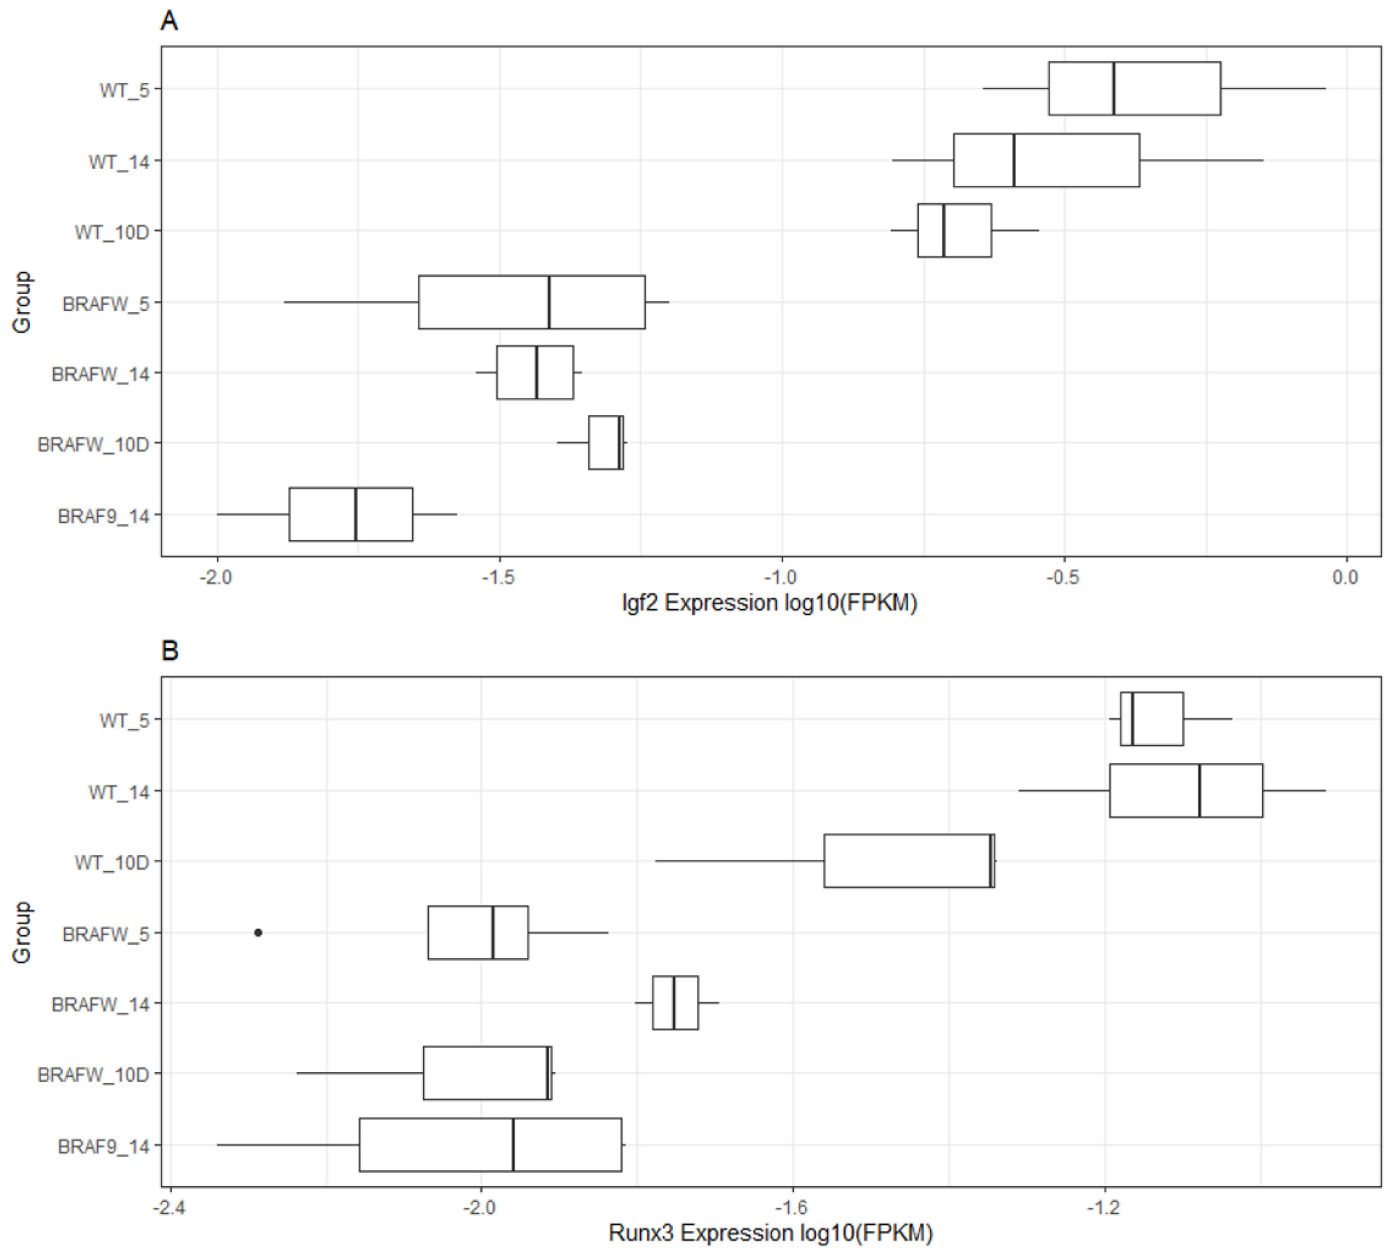

Supplement: gutjnl-2020-322166supp004_data_supplement.pdf [file gutjnl-2020-322166supp004_data_supplement.pdf]

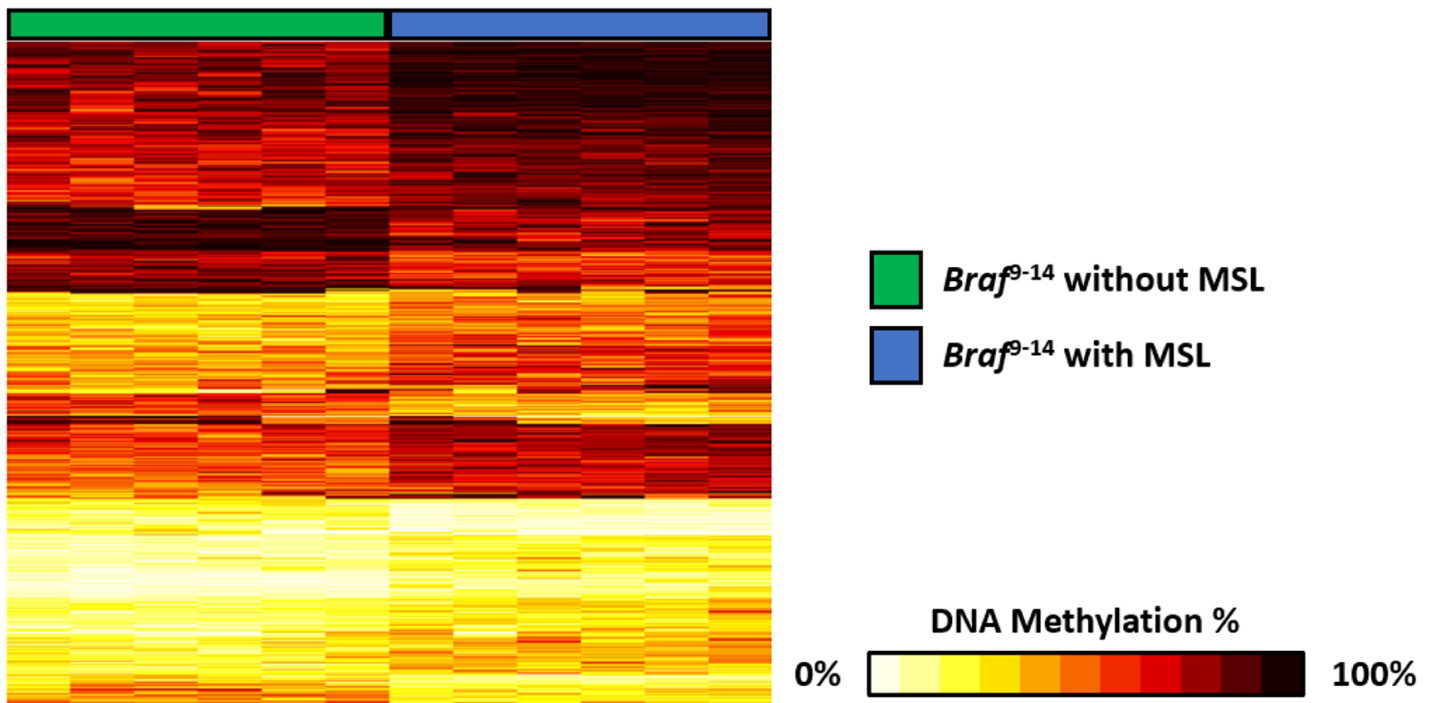

Supplement: gutjnl-2020-322166supp005_data_supplement.pdf [file gutjnl-2020-322166supp005_data_supplement.pdf]

A

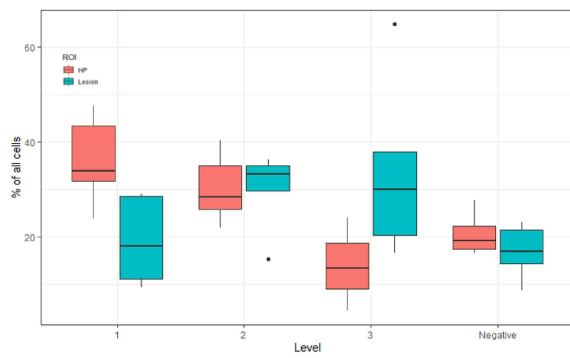

B

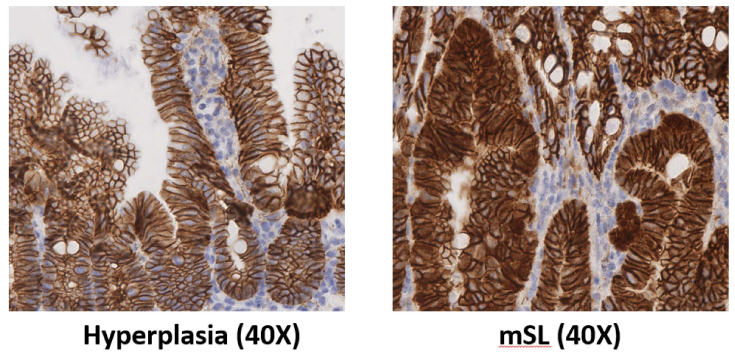

Supplement: gutjnl-2020-322166supp006_data_supplement.pdf [file gutjnl-2020-322166supp006_data_supplement.pdf]

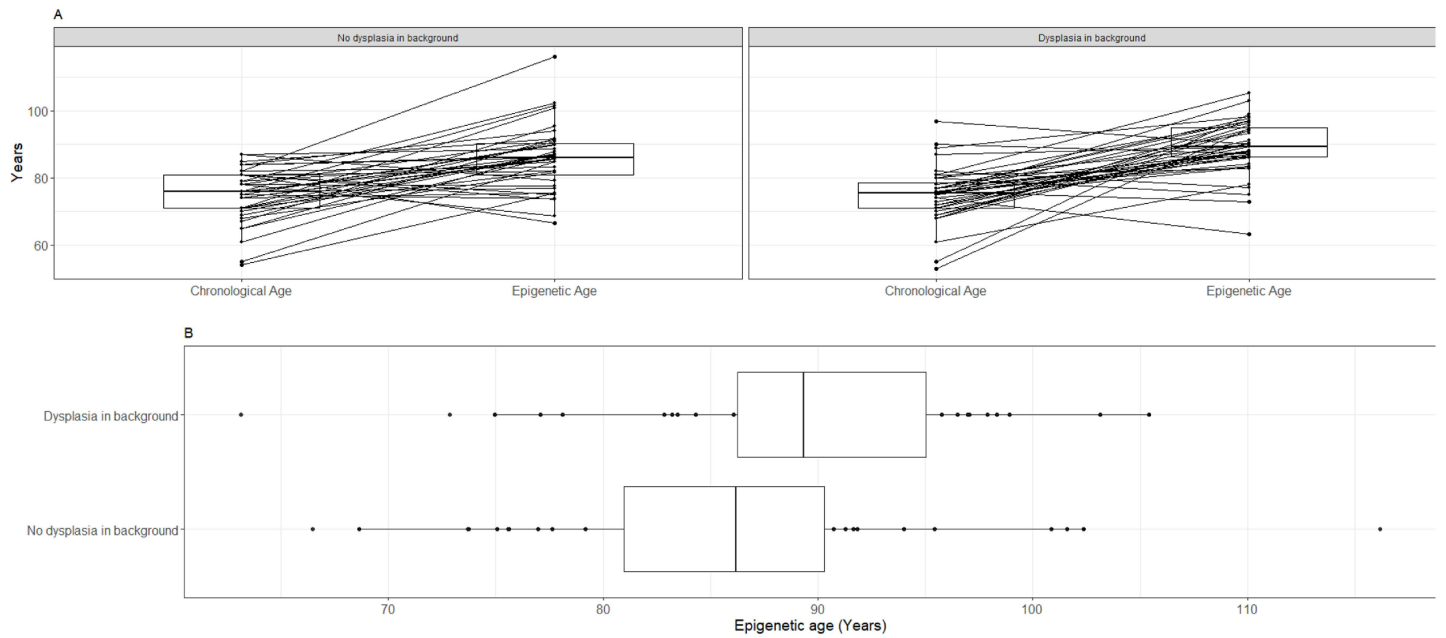

Supplement: gutjnl-2020-322166supp007_data_supplement.pdf [file gutjnl-2020-322166supp007_data_supplement.pdf]

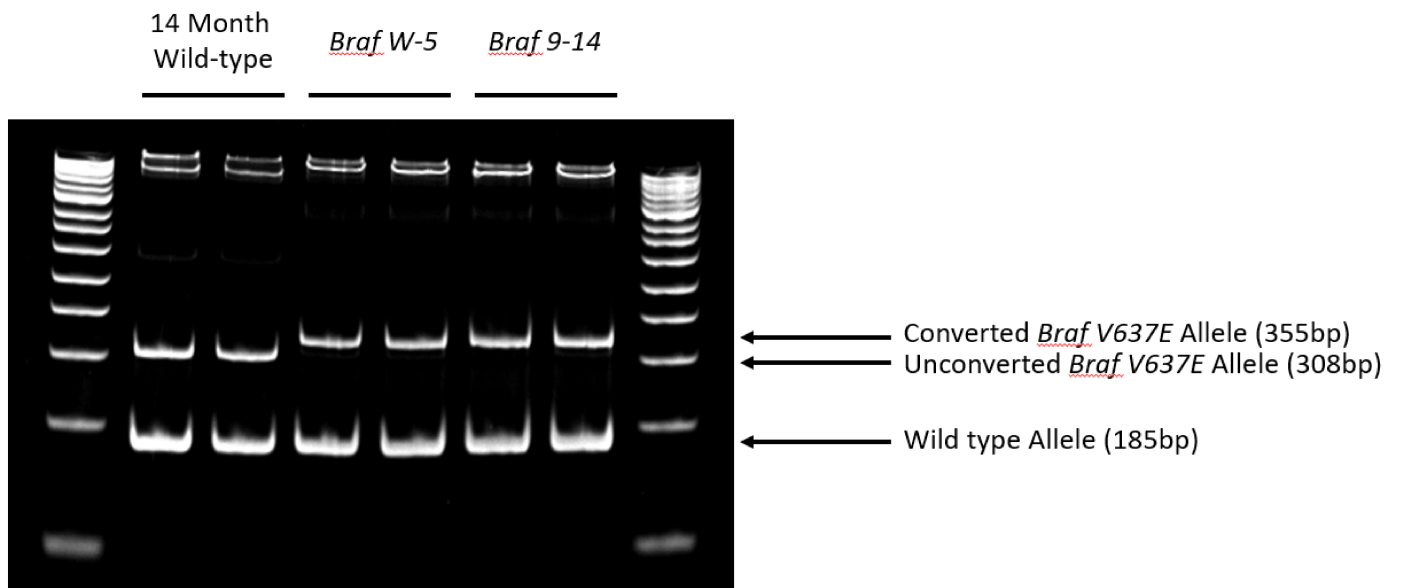

Supplement: gutjnl-2020-322166supp008_data_supplement.pdf [file gutjnl-2020-322166supp008_data_supplement.pdf]
